# 1 Spontaneous parthenogenesis in the parasitoid wasp *Cotesia typhae*: low 2 frequency anomaly or evolving process?

3 Claire Capdevielle Dulac<sup>1, \*</sup>, Romain Benoist<sup>1</sup>, Sarah Paquet<sup>1</sup>, Paul-André Calatayud<sup>1</sup>, Julius Obonyo<sup>2</sup>,  
4 Laure Kaiser<sup>1</sup>, Florence Mougel<sup>1</sup>

5  
6 <sup>1</sup> Université Paris-Saclay, CNRS, IRD, UMR Évolution, Génomes, Comportement et Écologie, 91198, Gif-sur-  
7 Yvette, France.

8 <sup>2</sup> *icipe*, International Center of Insect Physiology and Ecology, P.O. Box 30772-00100, Nairobi, Kenya

9  
10 \* Corresponding author: [claire.capdevielle-dulac@egce.cnrs-gif.fr](mailto:claire.capdevielle-dulac@egce.cnrs-gif.fr)  
11

## 12 Abstract

13 Hymenopterans are haplodiploids and unlike most other Arthropods they do not possess sexual  
14 chromosomes. Sex determination typically happens via the ploidy of individuals: haploids become  
15 males and diploids become females. Arrhenotoky is believed to be the ancestral reproduction mode  
16 in Hymenopterans, with haploid males produced parthenogenetically, and diploid females produced  
17 sexually. However, a number of transitions towards thelytoky (diploid females produced  
18 parthenogenetically) have appeared in Hymenopterans, and in most cases populations or species are  
19 either totally arrhenotokous or totally thelytokous. Here we present the case of *Cotesia typhae*  
20 (Fernandez-Triana), a Braconidae that produces parthenogenetic females at a low frequency. The  
21 phenotyping of two laboratory strains and one natural population showed that this frequency is  
22 variable, and that this rare thelytokous phenomenon also happens in the wild. Moreover, mated  
23 females from one of the laboratory strains produce a few parthenogenetic daughters among a  
24 majority of sexual daughters. The analysis of daughters of heterozygous virgin females allowed us to  
25 show that a mechanism similar to automixis with central fusion is very likely at play in *C. typhae*. This  
26 mechanism allows some parts of the genome to remain heterozygous, especially at the  
27 chromosomes' centromeres, which can be advantageous depending on the sex determination  
28 system involved. Lastly, in most species, the origin of thelytoky is either bacterial or genetic, and an  
29 antibiotic treatment as well as PCR experiments did not demonstrate a bacterial cause in *C. typhae*.  
30 The unusual case of low parthenogenetic frequency described in this species constitutes another  
31 example of the fascinating diversity of sex determination systems in Arthropods.

## 33 Introduction

34 Sexual reproduction is the most widespread reproductive strategy among multicellular organisms  
35 and especially in animals. In contrast with its predominance, this reproductive mode appears costly  
36 due, for instance, to the necessity to detect and attract a partner, escape sexually transmitted  
37 diseases or avoid predation during mating. Because they share parenthood with their mate, sexual  
38 individuals transmit two-fold less of their genetic material to their progeny compared to asexual  
39 counterparts. The ubiquity of sex despite such disadvantages led to the definition of the so-called  
40 "paradox of sex" (Meirmans et al., 2012; Otto, 2009).

41 Numerous cases of evolution toward asexual reproduction or parthenogenesis have been reported,  
42 notably within arthropod taxa (The Tree of Sex Consortium, 2014). Parthenogenesis can produce  
43 either males (arrhenotoky) or females (thelytoky) from unfertilized eggs, but only the last case  
44 strictly coincides with asexual reproduction. It is also referred to as parthenogenesis *sensu stricto*.

45 Thelytoky has been observed in almost all basal Hexapoda and non-holometabolous insect taxa  
46 (Vershina and Kuznetsova, 2016) as well as in many holometabolous insect species (Gokhman and  
47 Kuznetsova, 2018). This wide taxonomic range illustrates the frequent transition from sexual to  
48 asexual taxa that arose independently in various lineages. This scattered distribution hides a global  
49 low percentage of parthenogenesis: thelytokous species represent less than 1% of the Hexapoda  
50 (Gokhman and Kuznetsova, 2018). The proportion of asexual lineages is also highly heterogeneous  
51 among taxa. Liegeois et al., (2021) detected frequencies between 0 and 6.7% among families of  
52 mayflies. Van der Kooij et al. (2017) reported frequencies ranging from 0 to 38% among genera of  
53 haplodiploid arthropods.

54 Transition from a sexual to asexual reproductive mode requires bypassing genetic and  
55 developmental constraints, a challenge that may be easier to face in some taxa. In most species with  
56 a haplodiploid sex determination system, males develop from unfertilized eggs and are haploid while  
57 females develop from fertilized eggs leading to a diploid state. In such cases, embryonic development  
58 is initiated independently from egg fertilization, a trait probably favouring an evolution toward  
59 thelytoky (Vorbürger, 2014). The variable frequency of asexual reproduction even among  
60 haplodiploid lineages indicates that other factors allowing the transition toward this reproductive  
61 mode remain to be identified (van der Kooij et al., 2017).

62 The multiple and independent acquisitions of asexual reproduction are associated with numerous  
63 mechanisms that maintain or restore diploid state and produce females (Rabeling and Kronauer,  
64 2013; Vorbürger, 2014), as illustrated in Figure 1A. The figure focuses on genetic consequences in  
65 terms of heterozygosity, but each described situation may result from different cytological  
66 mechanisms. Apomixis induces clonal reproduction and allows the complete preservation of  
67 heterozygosity. It may arise from mitosis, but also from endoreplication preceding meiosis with  
68 sister chromosome pairing, resulting in recombination between identical chromosomes (Archetti,  
69 2010; Ma and Schwander, 2017). In automixis, meiosis occurs and is followed by different diploid  
70 restoration processes. Two meiosis products may assemble to generate a diploid cell: i) fusion of  
71 non-sister products separated during the first *reductional* division in central fusion or ii) fusion of  
72 sister cells produced during the second *equational* division in terminal fusion. Note that similar  
73 patterns are obtained when one meiotic division is suppressed to ensure the maintenance of a  
74 diploid state: the lack of first division is equivalent to central fusion while the lack of second division  
75 equates to terminal fusion. The restoration of diploidy may also result from gamete duplication  
76 involving either fusion of mitosis products or chromosomal replication without cellular division. In  
77 some lineages, the restoration of diploidy may operate during embryogenesis *via* endomitosis (Little  
78 et al., 2017; Pardo et al., 1995). Other mechanisms not illustrated here involve endomitosis followed  
79 by meiosis with non-sister chromosomes pairing or inverted meiosis with central or terminal fusion  
80 (Archetti, 2022, 2010). The consequences of thelytoky in terms of heterozygosity are variable  
81 depending on the mechanism: from complete homozygosity in one generation under gamete  
82 duplication to completely preserved heterozygosity in apomixis, with intermediate levels of  
83 homozygosity in terminal and central fusion. According to the biology of a given species and the  
84 degree of necessity for maintaining heterozygosity, one or other mechanism may be favoured.

85 Three main origins of thelytoky have been described: hybridization, bacterial endosymbiosis and  
86 genetic mutation (Tvedte et al., 2019). Hybridization, joining genomes from two distinct species,  
87 leads to improper chromosome pairing and dysfunctional meiosis that may promote asexuality  
88 (Morgan-Richards and Trewick, 2005). Endosymbiotic origin is the most widely studied cause of  
89 parthenogenesis (Ma and Schwander, 2017). To date, only bacteria have been shown to act as  
90 parthenogenesis inducers, but it is likely that other microorganisms could be involved. Most of the

91 described causative agents belong to the genera *Wolbachia*, *Rickettsia* and *Cardinium*,  
92 endosymbionts also known to induce cytoplasmic incompatibility or feminization of male embryos.  
93 The particularity of endosymbiont induced parthenogenesis resides in its partial or total reversibility.  
94 Thelytokous species treated with antibiotics or heat may revert to sexual reproduction, although  
95 often performing less well than true sexual counterparts (Stouthamer et al., 1990). The genetic origin  
96 of thelytoky has often been suggested when antibiotic or heat treatment had no effect, but the  
97 precise identification of loci responsible for parthenogenesis has only been conducted in a few  
98 species (Chapman et al., 2015; Jarosch et al., 2011; Lattorff et al., 2005; Sandrock and Vorburger,  
99 2011).

100 The relative frequency of thelytoky and sexual reproduction within species also varies according to  
101 taxa (Gokhman and Kuznetsova, 2018; Vershinina and Kuznetsova, 2016). Some species are  
102 described as obligate thelytokous when this mode of reproduction is the only one observed.  
103 Alternatively, thelytoky appears cyclic in some species where asexual generations alternate with  
104 sexual ones (Neiman et al., 2014). In other cases, polymorphism in the reproductive mode is  
105 observed either between populations (Foray et al., 2013; Leach et al., 2009) or within populations  
106 (Liu et al., 2019). Even in such polymorphic situations, thelytokous females usually produce female  
107 only progeny, albeit with a very low frequency of males in some cases, allowing rare events of sexual  
108 reproduction (Pijls et al., 1996).

109 Spontaneous occurrence of parthenogenesis has also been described in species reproducing via a  
110 sexual mode and qualified as tycho-parthenogenesis (Ball, 2001; Pardo et al., 1995).  
111 Tycho-parthenogenesis is characterized by a low hatching rate and a weak survival probability of the  
112 offspring (Little et al., 2017). It is typically considered as a dead-end accidental phenomenon in  
113 species adapted to sexual reproduction, although it may also correspond to an intermediate state in  
114 the evolution toward asexuality (van der Kooi and Schwander, 2015).

115 *Cotesia typhae* (Fernandez-Triana; Hymenoptera, Braconidae) is a gregarious endoparasitoid wasp  
116 native to Eastern Africa (Kaiser et al., 2017, 2015). It is specialized to one host, the corn stemborer  
117 *Sesamia nonagrioides* (Lefèbvre, Lepidoptera, Noctuidae). *Cotesia typhae* reproduces sexually and  
118 fertilized females typically lay 70-100 eggs in the first host encountered, among which about 70%  
119 develop into females and 30% into males (Benoist et al., 2020b). At least in laboratory conditions,  
120 sister-brother mating (sib-mating) frequently occurs indicating that inbreeding is not detrimental to  
121 this species. A genetic survey was conducted on this parasitoid wasp to compare two laboratory  
122 strains initiated from wild individuals sampled in two distant Kenyan localities, Kobodo and Makindu  
123 (Benoist et al., 2020a). The study led to the construction of a genetic map, based on crosses between  
124 the two strains. The phenotyping of the progenies obtained from these controlled crosses revealed  
125 an extremely variable sex-ratio, ranging from 100% to as low as 5% of females. Such a phenomenon  
126 could result from poorly mated females but also from rare thelytokous events in the progeny of  
127 unfertilized females. This last hypothesis was validated in a preliminary experiment allowing virgin  
128 females to oviposit. Among the numerous males emerging from the parasitized hosts, a few females  
129 were detected.

130 The aim of this study is to describe the low frequency thelytoky phenomenon in *Cotesia typhae* as a  
131 possible case of asexuality emergence. We first confirmed that this low frequency phenomenon is  
132 not restricted to artificial breeding but is also observed in natural conditions. We then tested  
133 whether thelytoky is induced by environmental conditions, that is lack of fertilisation, or observed in  
134 the progeny of mated as well as virgin females. Finally, we addressed the question of the  
135 mechanisms allowing the asexual production of females, because these mechanisms are tightly  
136 linked to the loss or conservation of heterozygosity and to the evolvability of asexual lineages.

137

## 138 **Material and Methods**

### 139 **Biological material**

140 Two separate *Cotesia typhae* parasitoid strains were obtained from adults that emerged from  
141 naturally parasitized *Sesamia nonagrioides* caterpillars collected in the field at two localities in Kenya  
142 (Kobodo: 0.679S, 34.412E; West Kenya; 3 caterpillars collected in 2013 and Makindu: 2.278S,  
143 37.825E; South-East Kenya; 10 caterpillars collected in 2010-2011). Isofemale lines were initiated in  
144 2016 and inbred rearings have been subsequently kept for more than 80 generations at the  
145 Evolution, Génomes, Comportement et Ecologie laboratory (EGCE, Gif-sur-Yvette, France), where  
146 cross experiments and phenotyping were performed. The phenotyping of the wild population was  
147 performed on individuals that emerged from naturally parasitized *Sesamia nonagrioides* caterpillars  
148 collected in the field in 2020 at Kobodo (see above). The *S. nonagrioides* host strain used was  
149 initiated from caterpillars collected at Makindu (see above) and Kabaa (1.24S, 37.44E). The rearing  
150 protocol of *C. typhae* and *S. nonagrioides* is detailed in Benoist et al. (2020b).

151

### 152 **DNA extraction and genotyping methods**

153 For our different experiments, DNA was extracted from *C. typhae* individuals using the NucleoSpin®  
154 Tissue from Macherey Nagel, following the manufacturer's instructions. For the experiment analysing  
155 the offspring of mated females, a direct PCR method was used instead of a classic DNA extraction  
156 because of the high number of individuals to be genotyped. In this case, for each individual, the  
157 abdomen was removed (because the presence of gametes could hinder the genotyping) and the rest  
158 of the body was placed in 20µL of Dilution Buffer and 0.5µL of DNA Release Additive  
159 (Thermoscientific). The tubes were kept at room temperature for 5 minutes then placed at 98°C for 2  
160 minutes. One microliter of this mix or of DNA was then used as template for the following PCR.

161 Two different methods were used to genotype the chosen SNP markers, either HRM (High Resolution  
162 Melt), or allele specific PCR. HRM is based on the analysis of melt curves of DNA fragments after  
163 amplification by PCR. The melt curves are different according to the nucleotide composition of the  
164 DNA fragments, and therefore allow discrimination between homozygotes and heterozygotes at a  
165 given SNP. For each SNP marker, a 10µL mix was made with about 1ng of DNA, 0.2µM of each  
166 primer, and 5µL of Precision Melt Supermix (Bio-Rad), completed with water. The PCR protocol was  
167 95°C for 2 minutes, followed by 40 cycles of 95°C for 10 seconds, 60°C for 30 seconds, 72°C for 30  
168 seconds, followed by a complete denaturation of 30 seconds at 95°C before performing the melt  
169 curve. The melt curve was performed on a CFX96™ Real-Time System (Bio-Rad), and was started by  
170 an initial step of 1 minute at 60°C, followed by 10 seconds of every 0.2°C increment between 65°C  
171 and 95°C. The raw data resulting from the melt curves were analysed with the uAnalyze v2.1  
172 software (Dwight et al., 2012) in order to infer the individuals' genotypes at each SNP marker.

173 Two SNP markers (8225nov and 21770nov) were genotyped using allele specific PCR. For this  
174 method, two parallel amplifications were performed on individuals, one of the primers of the couple  
175 being a common primer, and the other one being a specific primer, either to the Makindu, or Kobodo  
176 allele. About 1ng of DNA was mixed with 1X buffer, 3mM MgCl<sub>2</sub>, 0.4mM dNTP, 0.4µM of each primer,  
177 1U GoTaq® Flexi DNA Polymerase (Promega), and completed with water. The PCR programme was 5  
178 minutes at 95°C, followed by 40 cycles of 95°C for 1 minute, 50°C or 55°C for 1 minute (50°C for  
179 8225nov and 55°C for 21770nov), 72°C for one minute and a final elongation of 5 minutes at 72°C.

180 The PCR products were then run on a 2% agarose gel to check which PCR were positive and therefore  
181 infer the genotypes.

182 All the primers used were designed for this study and their sequences are given in Supplementary  
183 Table 2.

184

### 185 **Phenotyping the strains/populations for the thelytokous character**

186 In this study, the phenotyping consists of counting the number of males and females in the offspring  
187 of virgin females, to quantify the thelytoky phenomenon. To obtain virgin females, individual  
188 cocoons were isolated from cocoon masses and kept in tubes with a moistened cotton wool ball and  
189 a drop of honey at 27°C until the emergence of the adults. The virgin females were then each  
190 allowed to oviposit in one *S. nonagrioides* caterpillar, and the number of males and females in their  
191 offspring was counted after the development of the new *C. typhae* generation.

192

### 193 **Flow cytometry for ploidy analysis**

194 Flow cytometry analysis was performed on one control female from a mixed cocoon mass (produced  
195 by a fertilized female), two control males, and five parthenogenetic females (produced by a virgin  
196 female), all coming from the Makindu laboratory strain, to determine their ploidy. The individuals  
197 were frozen in liquid nitrogen and processed in the Imagerie-Gif Platform of Institute for Integrative  
198 Biology of the Cell (I2BC), CNRS, Gif-sur-Yvette according to the protocol in (Bourge et al., 2018).

199

### 200 **Fecundity assessment of parthenogenetic females**

201 Parthenogenetic females were tested for their fecundity and their ability to perform thelytoky. To  
202 test whether mated parthenogenetic females had the same fecundity as mated control females,  
203 cocoon masses resulting from the eggs laid by *C. typhae* Makindu virgin females in *S. nonagrioides*  
204 caterpillars were divided in smaller cocoon packs to spot the few parthenogenetic females more  
205 easily among the males after the emergence of the adults. Adults were left together for one day with  
206 water and honey to allow mating, and eleven parthenogenetic females were then allowed to oviposit  
207 in *S. nonagrioides* caterpillars. After the emergence of the resulting offspring, the number of males  
208 and females was counted for each one of them and the sex-ratio was calculated for comparison with  
209 that obtained from fertilized females from the control Makindu laboratory strain. To test whether  
210 virgin parthenogenetic females were able to produce parthenogenetic daughters, all the cocoons  
211 from 5 virgin females' progenies were isolated and the virgin parthenogenetic females emerging  
212 from these cocoons were allowed to oviposit in *S. nonagrioides* caterpillars. The number of males  
213 and females was then counted in each resulting offspring.

214

### 215 **Identifying the thelytoky mechanism in *Cotesia typhae***

216 To find out which thelytoky mechanism is at play in the *C. typhae* Makindu laboratory strain, virgin  
217 heterozygous females are needed to analyse the recombination patterns of their offspring. Indeed,  
218 according to the mechanism, the female offspring will be more or less heterozygous, as explained in  
219 introduction (Figure 1A). To obtain virgin heterozygous females, six controlled crosses were  
220 performed between the Makindu and Kobodo laboratory strains, 3 in each direction (Figure 1B). Prior

221 to this, cocoons had been isolated from masses of each strain, in order to obtain virgin males and  
222 females for the crosses. Cocoons were then isolated from the masses resulting from the crosses,  
223 leading to the emergence of virgin F1 heterozygous females. 57 of these females were allowed to  
224 oviposit in *S. nonagrioides* caterpillars, and the offspring of the 57 resulting cocoon masses were  
225 sexed and counted. Six females and four males from the two parental strains (including the  
226 individuals used for the initial crosses), five F1 heterozygous females and the nine parthenogenetic  
227 females obtained through this experiment were kept for DNA extraction and genotyping, in order to  
228 analyse the recombination patterns resulting from parthenogenesis.

229 To analyse the recombination patterns of the nine parthenogenetic females, we genotyped 63 SNP  
230 (Single Nucleotide Polymorphism) markers, having different alleles between the Makindu and  
231 Kobodo strains, and being distributed along the 10 chromosomes of the genetic map of *Cotesia*  
232 *typhae*, (Benoist et al., 2020a). Four chromosomes contained more markers than the others to  
233 investigate the recombination patterns along chromosomes. For these four chromosomes, the  
234 markers were chosen to have about 10cM between two successive markers when possible. The  
235 markers were genotyped according to the protocol described above, and their genetic position is  
236 given in Supplementary Table 1.

237

### 238 **Identifying the thelytoky phenomenon in mated females' progenies**

239 To see if mated females produce parthenogenetic daughters as well as sexual daughters, 40 crosses  
240 between Makindu virgin females and Kobodo males were performed, according to the protocol  
241 described in the previous section. By genotyping the daughters of these crosses with a SNP marker  
242 differing between the Makindu and Kobodo strains, we can deduce if they were produced sexually (if  
243 heterozygous at the marker) or through parthenogenesis (if homozygous for the Makindu allele at  
244 the marker).

245 Out of the 40 crosses, five resulted in male only offspring and were removed from our analysis. The  
246 35 remaining crosses lead to a mix of male and female offspring, for a total of 1861 daughters and  
247 1803 sons. The 1861 daughters were genotyped at one SNP marker, 27068nov, according to the  
248 protocol described in the dedicated section. All the females that had a clear Makindu homozygote  
249 genotype and all the females presenting an uncertain genotype were then genotyped at 2 more  
250 markers (8225nov and 21770nov) to confirm their status.

251



1A)

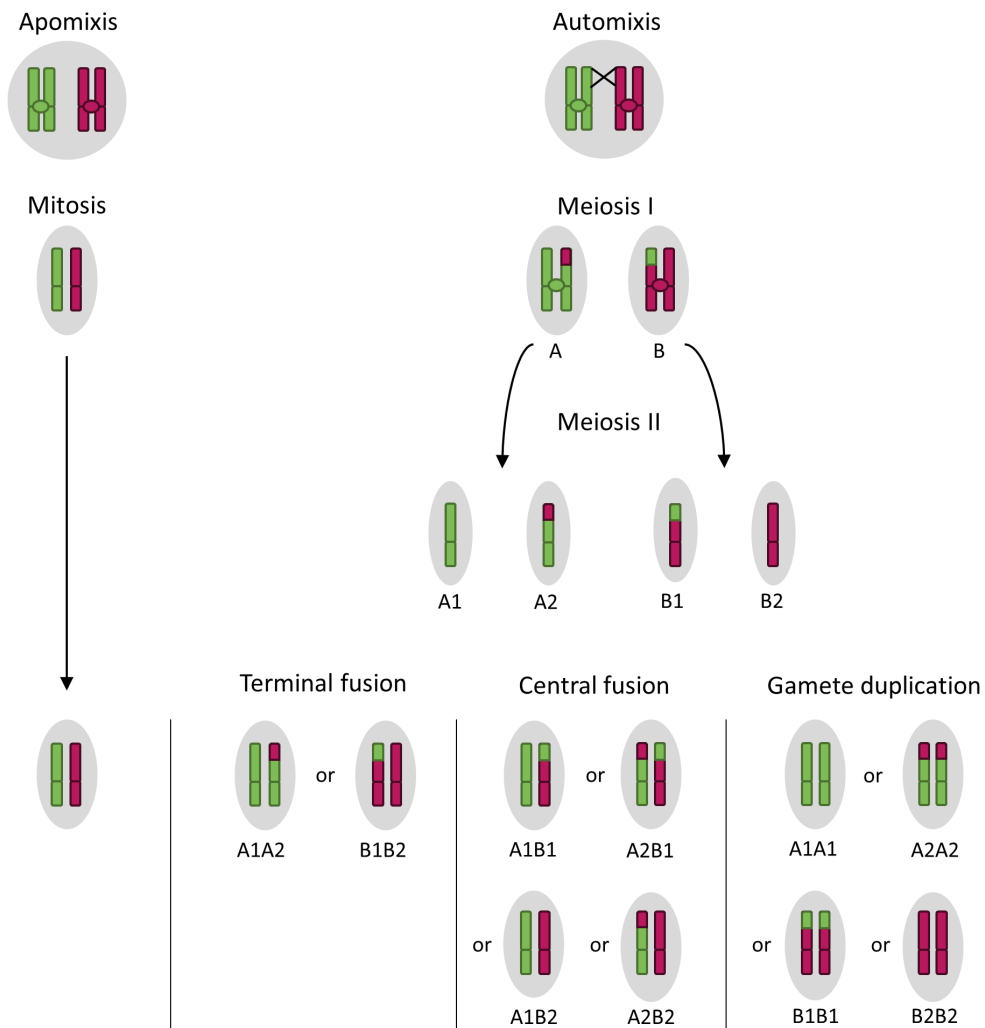

1B)

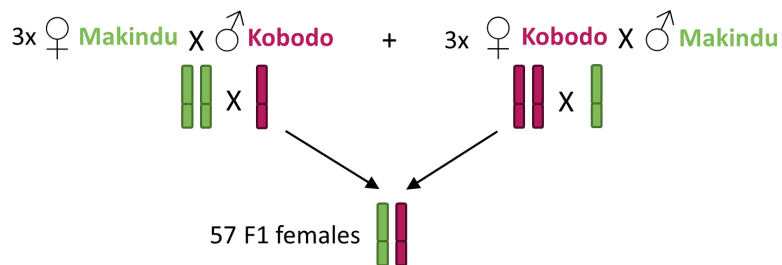

252

253 Figure 1: A) Expected genotype patterns of parthenogenetic daughters according to the main known  
 254 thelytoky mechanisms. The cytological mechanisms are simplified because the figure focuses on the

255 genetic consequences that can be achieved in different ways (see introduction for further details).  
256 The patterns can vary from complete loss of heterozygosity (under gamete duplication) to complete  
257 maintenance of heterozygosity (under apomixis). B) Crosses performed in this study in order to  
258 obtain virgin heterozygous females. The analysis of recombination patterns of their daughters can  
259 give clues on the thelytoky mechanism involved.

260

## 261 **Search for a bacterial cause of thelytoky in *Cotesia typhae***

262 To find out if the cause of thelytoky in *C. typhae* could be bacterial, we first performed PCR with  
263 primers designed to amplify DNA sequences from several micro-organisms known to manipulate sex  
264 in insects. Ten virgin Makindu females that produced parthenogenetic daughters and two virgin  
265 Makindu females that didn't produce daughters were tested with 8 primer sets, taken from Foray et  
266 al., (2013), except for one primer set, specific to *Wolbachia*, taken from Casiraghi et al., (2005). The  
267 primer sequences, T<sub>m</sub> used for PCR, and their original publication are given in Supplementary Table  
268 3. About 1ng of DNA was mixed with 1X buffer, 3mM MgCl<sub>2</sub>, 0.4mM dNTP, 0.4μM of each primer, 1U  
269 GoTaq® Flexi DNA Polymerase (Promega), and completed with water. The PCR programme was 5  
270 minutes at 95°C, followed by 40 cycles of 95°C for 1 minute, T<sub>m</sub> for 1 minute, 72°C for one minute  
271 and a final elongation of 5 minutes at 72°C. The PCR products were then run on a 1% agarose gel to  
272 check for positive amplification.

273 The amplified fragments obtained with the *Arsenophonus* primer set were sequenced with the  
274 BigDye™ Terminator v1.1 Cycle Sequencing Kit (ThermoFisher Scientific), following the  
275 manufacturer's protocol. After the identification of the bacteria *Pantoea dispersa* through  
276 sequencing, 8 virgin Kobodo females that didn't produce any parthenogenetic daughters were also  
277 tested with this primer set. Since our Kobodo laboratory strain doesn't undergo thelytoky, this test  
278 was performed to check if *Pantoea dispersa* could be the causative agent of thelytoky in *C. typhae*.

279 To complete this experiment, we performed an antibiotic treatment on the Makindu laboratory  
280 strain to remove any potential sex manipulating bacteria in *C. typhae* females. Rifampicin was added  
281 in the host caterpillars' artificial diet, at a final concentration of 2g/L, for 4 *C. typhae* generations. This  
282 treatment has previously been shown to eliminate *Wolbachia* bacteria in a close species, *Cotesia*  
283 *sesamiae* (Mochiah et al., 2002). The phenotyping results after this first treatment being ambiguous,  
284 it was continued for 7 more generations, with tetracyclin added for the 4 last generations, also at a  
285 final concentration of 2g/L. At that point, 79 virgin *C. typhae* females were phenotyped, according to  
286 the phenotyping protocol previously described.

287

## 288 **Results**

### 289 **Phenotypes of the different strains/populations**

290 We phenotyped two laboratory strains for the thelytokous character, Makindu and Kobodo, and a  
291 wild population, coming from the Kobodo locality. The numbers of available virgin females obtained  
292 for phenotyping were as follows: 99 from 13 different cocoon masses for the Makindu strain, 40 from  
293 7 cocoon masses for the Kobodo strain, and 29 from 6 cocoon masses for the Kobodo wild  
294 population. The results (Table 1) are very contrasted between these three populations, since the  
295 number of parthenogenetically produced females (hereafter referred as parthenogenetic females) is  
296 null in the Kobodo isofemale strain, intermediate in the Kobodo wild population (28% of virgin  
297 females produced daughters), and high in the Makindu isofemale strain (68% of virgin females



298 produced daughters). The thelytokous phenotype is therefore present in the wild and is not a  
 299 laboratory artefact, but was apparently lost in the Kobodo laboratory strain (likely due to genetic  
 300 drift), or present at a frequency too low to be detected. Unfortunately, the wild Makindu population  
 301 does not exist anymore and could not be tested in this study.

302

|                                           |                      | N  | Number of virgin females that produced female offspring (parthenogenetically)<br>Percentage [95% confidence interval] | Number of males produced by all virgin females | Number of females produced by all virgin females<br>Percentage [95% confidence interval] | Mean number [min ; max] of parthenogenetic females in the offspring presenting females |
|-------------------------------------------|----------------------|----|-----------------------------------------------------------------------------------------------------------------------|------------------------------------------------|------------------------------------------------------------------------------------------|----------------------------------------------------------------------------------------|
| Makindu isofemale strain                  |                      | 99 | 67<br>68% [57.4-76.5]                                                                                                 | 10657                                          | 225<br>2% [1.81-2.36]                                                                    | 3.4 [1;8]                                                                              |
| Kobodo isofemale strain                   |                      | 40 | 0                                                                                                                     | 5405                                           | 0                                                                                        | -                                                                                      |
| Kobodo wild population                    |                      | 29 | 8<br>28% [13.4-47.5]                                                                                                  | 2132                                           | 8<br>0.4% [0.17-0.77]                                                                    | 1 [1;1]                                                                                |
| Makindu strain after antibiotic treatment | After 4 generations  | 55 | 15<br>27% [16.5-41.2]                                                                                                 | 5886                                           | 17<br>0.3% [0.17-0.47]                                                                   | 1.13 [1;2]                                                                             |
|                                           | After 11 generations | 79 | 13<br>16% [9.4-26.9]                                                                                                  | 8272                                           | 16<br>0.2% [0.11-0.32]                                                                   | 1.23 [1;4]                                                                             |

303 Table 1: Results of the thelytoky phenotyping of the different strains/populations. The phenotyping is  
 304 based on the number and frequency of daughters produced parthenogenetically (parthenogenetic  
 305 females) in the offspring of virgin *C. typhae* females. "N" is the total number of virgin females.

306

### 307 Ploidy of the daughters of virgin females

308 One daughter from the progeny of a fertilized female and 2 males, all belonging to the Makindu  
 309 laboratory strain, were processed by flow cytometry as respective controls for diploid and haploid  
 310 *Cotesia typhae* genomes. Five parthenogenetic daughters of virgin females were then processed,  
 311 resulting in an estimated genome size identical to the control female and twice that of the control

312 males (Table 2). We can therefore conclude that *C. typhae* parthenogenetic females are diploid and  
313 not the result of feminization of haploid eggs.

| Sample                   | Size (pg) | Size (Mpb) | Ploidy  |
|--------------------------|-----------|------------|---------|
| Control female           | 0.47      | 458.27     | Diploid |
| Control male 1           | 0.26      | 251.84     | Haploid |
| Control male 2           | 0.25      | 241.12     | Haploid |
| Parthenogenetic female 1 | 0.48      | 467.51     | Diploid |
| Parthenogenetic female 2 | 0.48      | 473.24     | Diploid |
| Parthenogenetic female 3 | 0.49      | 475.28     | Diploid |
| Parthenogenetic female 4 | 0.49      | 475.91     | Diploid |
| Parthenogenetic female 5 | 0.5       | 484.26     | Diploid |

314 Table 2: Genome size estimated by flow cytometry. Parthenogenetic females have the same genome  
315 size as the control female, corresponding to about twice the males' haploid genome size.

316

### 317 **Fecundity of parthenogenetic females**

318 Eleven parthenogenetic females (issued from virgin Makindu mothers) were randomly allowed to  
319 mate with their brothers and were used to parasitize eleven caterpillars. Out of these eleven  
320 females, 4 had male only offspring and 7 had a mixed offspring. The number of offspring per female  
321 and the sex-ratio are indicated in Table 3. No significant difference of the offspring size and sex ratio  
322 was observed between the control and parthenogenetic female datasets (p-value obtained following  
323 Mann-Whitney rank test was 0.559 for offspring number and 0.07 for sex-ratio). The fecundity of  
324 parthenogenetic females is therefore equivalent to that of the control females.

|                                     | N  | Mean number of offspring per mated female $\pm$ Standard Error | Mean female sex-ratio (when mated) $\pm$ Standard Error |
|-------------------------------------|----|----------------------------------------------------------------|---------------------------------------------------------|
| Control Makindu strain <sup>a</sup> | 41 | 59 $\pm$ 4.2                                                   | 0.78 $\pm$ 0.03                                         |
| Parthenogenetic females             | 7  | 54.3 $\pm$ 9.2                                                 | 0.65 $\pm$ 0.12                                         |

325 Table 3: Comparison of the fecundity between Makindu parthenogenetic females and control  
326 females of the same laboratory strain. a: data from (Benoist et al., 2017).

327 All the cocoons resulting from the egg-laying of five virgin females (385 cocoons in total) were  
328 isolated in order to obtain virgin parthenogenetic females. Fourteen females were thus obtained, out  
329 of which ten produced an offspring. Three out of these 10 offspring (30%) contained parthenogenetic  
330 females, for a total of 6 females and 773 males. Virgin parthenogenetic females are therefore able to  
331 produce parthenogenetic females themselves.

### 332 **Thelytoky mechanism occurring in *Cotesia typhae***

333 The genotyping of the 63 SNP markers first confirmed that fathers and mothers of the initial crosses  
334 between the Makindu and Kobodo laboratory strains were homozygotes for their strain's alleles. The  
335 57 virgin F1 daughters resulting from these crosses were thus heterozygous at the SNP markers,  
336 which was confirmed for the 5 F1 daughters that were genotyped. Each of these females successfully  
337 parasitized a host larva, and from the 57 resulting offspring, six contained parthenogenetic females  
338 (originating from 4 of the initial 6 crosses, 2 in each cross direction), corresponding to a total of 9 F2  
339 parthenogenetic females for 6653 males. These 9 females were genotyped for the 63 SNP. The  
340 genotypes and the deduced recombination events are presented in Supplementary Table 1. The  
341 recombination patterns of the 4 chromosomes genotyped with a higher density of markers are  
342 shown in Figure 2.

343 For six of the females, a mixture of heterozygous and homozygous markers was observed, with a  
344 surplus of heterozygotes (280 heterozygous genotypes for 94 homozygous genotypes). The number  
345 and pattern of heterozygous markers for these females indicates a mechanism similar to automixis  
346 with central fusion (it could either result from the lack of first meiotic division or from the fusion of  
347 two non-sister meiotic products). Indeed, the central parts of the chromosomes maintain a  
348 heterozygous state while there is a recombination gradient leading to more homozygous genotypes  
349 towards the extremities of the chromosomes (Fig. 2). On average, nine recombination events per  
350 genome were detected for these six females with a minimum value of five events and a maximum of  
351 16 events detected. Based on the density of the markers characterized, these results are consistent  
352 with the genetic length measured by Benoist et al. (2020a).

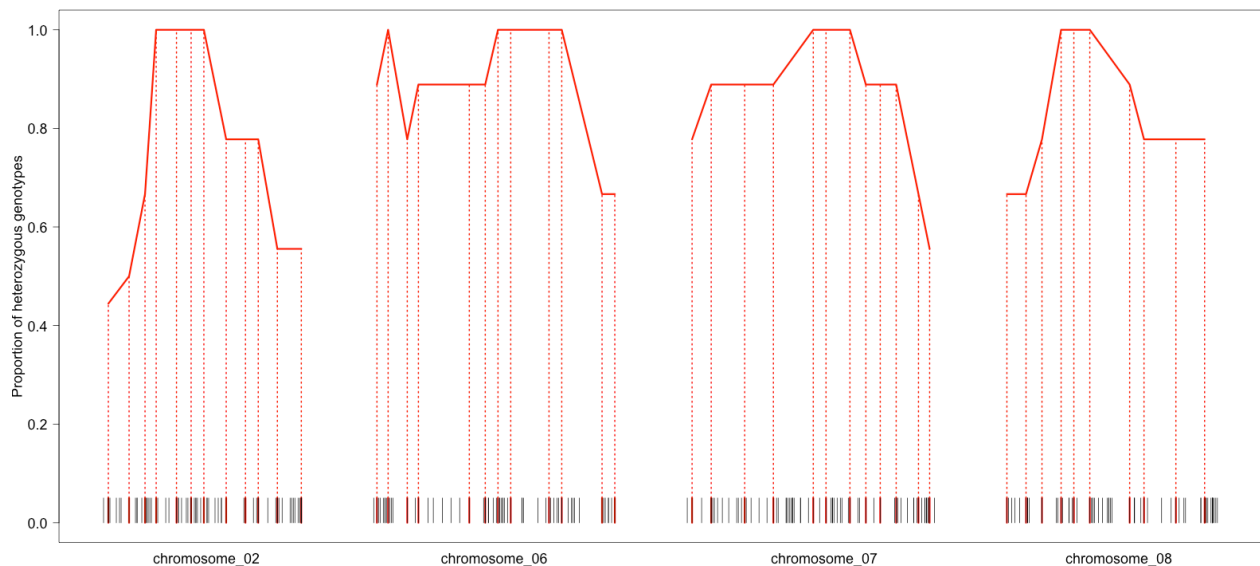

353  
354 Figure 2: Proportion of heterozygous females (out of nine) for each genotyped SNP marker. The  
355 results are only shown for the 4 chromosomes for which a higher number of markers were  
356 genotyped. The black segments on the x axis are indicative of the genetic position of all the markers  
357 of the genetic map (Benoist et al., 2020a) and the red segments with the dotted lines correspond to  
358 the positions of the markers genotyped in this study. The occurrence of homozygous and  
359 heterozygous states along the chromosomes is congruent with a mechanism similar to automixis.  
360 Given the metacentric nature of *C. typhae* chromosomes (C. Bressac, personal communication), the  
361 observation of 100% heterozygosity in the central part of the chromosomes suggests that diploidy is

362 either maintained by the suppression of the first meiotic division or restored through central fusion  
 363 and is indicative of the position of each chromosome's centromere.

364 For the other 3 parthenogenetic females, all the 63 markers were heterozygous, revealing no  
 365 detection of recombination event on the 10 chromosomes. We estimated the probability of such an  
 366 observation under the hypothesis that a unique mechanism such as central fusion occurs. For each  
 367 chromosome, we calculated a mean number of recombinations based on the nine parthenogenetic  
 368 females. Assuming that the number of recombinations on a chromosome follows a Poisson  
 369 distribution, we can estimate the probability of zero recombination for each chromosome based on  
 370 the mean number estimate. It varies according to the genetic length of the chromosome and to the  
 371 density of markers genotyped: it was estimated between 0.29 for chromosome 2 and 0.8 for  
 372 chromosome 9. Multiplying the probability over the ten chromosomes, we calculated a probability of  
 373 0.0025 to observe an entirely heterozygous parthenogenetic daughter. Using this individual  
 374 probability, we estimated that the probability to detect three out of nine parthenogenetic daughters  
 375 showing no recombination events on the 10 chromosomes was  $1.76 \times 10^{-6}$ . This hypothesis is very  
 376 unlikely, therefore we suspect another mechanism could also be at play in causing thelytoky in  
 377 *Cotesia typhae*. It is interesting to note that we observed both patterns (partial homozygosity and  
 378 complete heterozygosity) in the offspring resulting from initial crosses of both directions. Moreover,  
 379 one of the F1 heterozygous females displayed both patterns in her progeny. The raw data and the R  
 380 script used to estimate the given probability are available at <https://zenodo.org/record/6420801>.

381

### 382 **Presence of parthenogenetic females among the daughters of mated females**

383 Among the 40 crosses between Makindu females and Kobodo males, five gave male-only offspring  
 384 and were excluded. The 35 remaining crosses that presented offspring comprising both males and  
 385 females were kept in our analysis, leading to a total of 1861 females and 1803 males. All 1861  
 386 females were genotyped for one SNP marker. Females resulting from fecundation should be  
 387 heterozygous while parthenogenetic females should be homozygous for the Makindu allele. In total,  
 388 we found 14 homozygous females, which were confirmed by the genotyping of 2 other markers.  
 389 These 14 females correspond to 0.77% of the parthenogenetic offspring (males resulting from  
 390 arrhenotoky representing 99.33%) and originate from 10 different mothers (29% of the 35 mothers)  
 391 (Table 4). Even though the percentage of parthenogenetic females found is much smaller than in the  
 392 offspring of virgin females, this finding shows that the female progeny of mated females can come  
 393 from a mixture of parthenogenesis and sexual reproduction.

|                | N  | Number of females that produced parthenogenetic daughters<br>Percentage [95% confidence interval] | Number of parthenogenetic offspring (males plus parthenogenetic females) | Number of parthenogenetic females among the parthenogenetic offspring<br>Percentage [95% confidence interval] | Mean number [min ; max] of parthenogenetic females in the offspring presenting females |
|----------------|----|---------------------------------------------------------------------------------------------------|--------------------------------------------------------------------------|---------------------------------------------------------------------------------------------------------------|----------------------------------------------------------------------------------------|
| Makindu virgin | 99 | 67<br>68% [57.4-76.5]                                                                             | 10882                                                                    | 225<br>2% [1.81-2.36]                                                                                         | 3.4 [1;8]                                                                              |

|                       |    |                       |      |                         |           |
|-----------------------|----|-----------------------|------|-------------------------|-----------|
| females               |    |                       |      |                         |           |
| Makindu mated females | 35 | 10<br>29% [15.2-46.5] | 1817 | 14<br>0.77% [0.44-1.32] | 1.4 [1;3] |

394 Table 4: Comparison of the frequency of the thelytokous character between virgin and mated  
 395 Makindu females. In each case, the number of parthenogenetic daughters is presented as a  
 396 percentage of the total number of parthenogenetic offspring, mainly composed of males obtained  
 397 from arrhenotoky. “N” is the number of offspring analysed.

398

### 399 **Origin of thelytoky in *Cotesia typhae***

400 In order to find out if thelytoky in *Cotesia typhae* has a bacterial origin, we extracted DNA from  
 401 Makindu virgin mothers that produced daughters and used primers to try to amplify the DNA of six  
 402 different micro-organisms known for sex manipulation in insects: *Wolbachia*, *Rickettsia*, *Cardinium*,  
 403 *Arsenophonus*, *Spiroplasma* and *Microsporidia* (Foray et al., 2013). Only one primer set led to a solid  
 404 amplification, the one designed to amplify *Arsenophonus* 23S. After sequencing the amplified  
 405 fragment, the bacterium was identified not as *Arsenophonus* but as *Pantoea dispersa*, for which no  
 406 mention in relation to thelytoky was found in the literature. We then tried to amplify this same  
 407 bacterium from the DNA of Kobodo virgin mothers, who don’t produce any daughters: *Pantoea*  
 408 *dispersa* was present in all the samples tested. This makes it unlikely for this bacterium to be  
 409 responsible for thelytoky in *C. typhae*.

410 After rearing parasitized caterpillars for four generations on a rifampicin diet, we phenotyped the  
 411 Makindu strain again. 55 virgin females, coming from 5 different cocoon masses, were allowed to  
 412 parasitize *Sesamia nonagrioides* caterpillars. Fifteen of these virgin females produced daughters,  
 413 leading to a total of 17 daughters for 5886 sons (Table 1). Another phenotyping was performed on 79  
 414 females from 10 different cocoon masses, after 11 generations of a rifampicin diet (with tetracyclin  
 415 added for the last 4 generations). Thirteen of these virgin females produced daughters, leading to a  
 416 total of 16 daughters for 8272 sons (Table 1). The percentage of thelytokous females is thus smaller  
 417 than the one observed before antibiotic treatment but not null.

418

### 419 **Discussion**

420 The phenotypic survey presented here confirms the biological reality of low frequency asexual  
 421 production of females in the haplo-diploid Hymenoptera *Cotesia typhae*. The process has been  
 422 observed in a significant number of progenies from both an inbred laboratory strain and a natural  
 423 population. It has been shown to occur in the progeny of virgin as well as fertilized females, despite  
 424 concerning only a small fraction of the individuals from a cocoon mass.

425 This configuration of low frequency thelytoky is poorly illustrated in the literature, except in the well-  
 426 studied species *Apis mellifera* for which the phenomenon has been described for a long time  
 427 (Mackensen, 1943; Tucker, 1958). In the honey bee, both workers and virgin queens are able to  
 428 produce a small proportion of females among unfertilized progeny (Gloag et al., 2019). However, in a  
 429 common acceptation, the expression thelytoky is rather defined as a “parthenogenetic mode where  
 430 females produce only females from unfertilized eggs” (Vershina and Kuznetsova, 2016). Among  
 431 most illustrated examples of parthenogenesis *sensu stricto*, even when facultative, asexual

432 production of females involves the whole progeny. The case described here is somewhat closer to  
433 what is called tycho parthenogenesis, based on the frequency of birth of parthenogenetic female eggs  
434 (Whiting, 1945). Tycho parthenogenesis is defined as “kind of occasional thelytoky characterized by  
435 the spontaneous hatching of a small proportion of eggs laid by virgin females” (Pardo et al., 1995). It  
436 has been mainly described in diplo-diploid species where embryonic development is induced by  
437 sperm fertilization. In such species, developmental constraints and inbreeding depression prevent  
438 successful hatching of unfertilized eggs in most of the cases (Little et al., 2017). In haplo-diploid  
439 species, unfertilized eggs hatch with a high frequency because they naturally produce males in  
440 species reproducing sexually. It is thus difficult to classify *C. typhae* as a tycho parthenogenetic  
441 species. Moreover, because the daughters produced parthenogenetically turned out to be viable and  
442 fertile in *C. typhae*, low frequency thelytoky may be either neutral or beneficial but not  
443 disadvantageous as in most cases of tycho parthenogenesis described.

444 The question remains as to whether the phenomenon is accidental or an ongoing evolutionary  
445 process due to its adaptive benefit (van der Kooi and Schwander, 2015). In the eusocial species *Apis*  
446 *mellifera*, low frequency thelytoky is clearly beneficial to workers when confronted to a queen-less  
447 colony (Gloag et al., 2019). This advantage led to an increased frequency of workers’ reproduction in  
448 an honey bee subspecies (*Apis m. capensis*) and to the development of social parasitism where laying  
449 workers get adopted by a colony and compete the local queen (Neumann, 2001). Studying the  
450 occurrence of parthenogenesis among Ephemeroptera, Liegeois et al. (2021) suggested that asexual  
451 reproduction was selectively advantageous in many species from this insect order despite its  
452 associated low hatching success. The benefit derives from the short adult life and the low dispersal  
453 ability that reduce the probability of encountering a reproductive partner. The fitness of sexually  
454 reproducing individuals may consequently be reduced under certain circumstances. As in mayflies, *C.*  
455 *typhae* has an adult life limited to a few days (between two and three days in laboratory conditions,  
456 Kaiser et al., 2017). However, it is gregarious and mating between sisters and brothers emerging  
457 from the same cocoon mass is observed in rearing conditions. Female access to male fertilization  
458 should thus be facilitated unless sib-mating is avoided in natural conditions as demonstrated for its  
459 relative species *Cotesia glomerata* (Gu and Dorn, 2003) or *Venturia canescens* (Collet et al., 2020).  
460 Even in the presence of sexual partners, limited access to fertilization may also derive from  
461 ineffective copulation in cases of highly female biased sex ratios for example (Boivin, 2013). Whether  
462 it results from restricted access to males or to sperm itself, sperm limitation may favour expansion of  
463 asexual reproduction. Further experiments are needed to estimate mating and fertilization success of  
464 *Cotesia typhae* in natural conditions.

465 Beyond reproductive strategy itself, parthenogenesis has been shown to be associated with  
466 ecological characteristics that may favour or prevent its evolution. Two opposite ecological trends  
467 have been described co-occurring with asexual reproduction expansion: the “general purpose  
468 genotype” (GPG) where asexual lineages are observed on broader ecological niches than their sexual  
469 counterparts and the “frozen niche variation” (FNV) where parthenogenetic species or populations  
470 have far more restricted niches than sexual ones (Tvedte et al., 2019). Exploring a wide dataset of  
471 haplo-diploid arthropods reproducing exclusively parthenogenetically (obligate parthenogenesis), van  
472 der Kooi et al. (2017) concluded that GPG was the most common situation. They showed that most  
473 parthenogenetic species have broader ecological and geographical range than close relative sexual  
474 species but also that transition toward parthenogenesis was more likely for species exhibiting a wide  
475 distribution. Studying the relative advantage of sexual and asexual reproduction, Song et al., (2012)  
476 developed a model based on resource availability, in spatial and temporal heterogeneous situations.  
477 They showed that sexual reproduction prevails in most of the cases but that asexual reproduction  
478 may be favoured when resource diversity is low and resource remains abundant over generations.



479 Such a model corroborates numerous cases of ecological specialization of asexual lineages that have  
480 been described, such as *Venturia canescens*. In this polymorphic species, two kinds of populations  
481 live in sympatry: parthenogenetic populations found in stable anthropic habitats (bakeries and  
482 granaries) and sexual ones associated with natural and more instable resources (Schneider et al.,  
483 2002). Interestingly, before being characterized as a new species, *Cotesia typhae* was first identified  
484 as a specialized clade (only one host insect, *Sesamia nonagrioides*, mainly found on one host plant,  
485 *Typha domingensis*) of the parasitoid species *Cotesia sesamiae*. According to (Branca et al., 2019),  
486 some populations of *C. sesamiae* are less specialized than others. Studying the existence of  
487 thelytokous reproduction in those populations would be informative about the possible link between  
488 emerging parthenogenesis and specialization.

489 Regarding the mechanism involved in thelytokous reproduction, we faced an unexpected result as  
490 data strongly suggest that two different processes may co-occur: automixis with central fusion (or a  
491 similar cytological mechanism) and apomixis. More surprisingly, the two supposed mechanisms were  
492 observed to co-occur in the progeny of a single female (K4M1) and independently of the cross  
493 direction to obtain F1 virgin mothers (Kobodo female x Makindu male or Makindu female x Kobodo  
494 male). Unfortunately, this result is supported by small sample size due to the scarcity of the  
495 phenomenon. We may wonder whether a unique mechanism, distinct from those already described,  
496 could explain such a result. Ma and Schwander (2017) describe for example an unusual process  
497 where meiosis is inverted (sister chromatids separate before homologs) followed by terminal fusion.  
498 However, the resulting progeny of such a process is 100% heterozygous, a result that does not differ  
499 from apomixis. Another mechanism presented in the same review implies an endoreplication  
500 preceding meiosis. Assuming such a process occurs in *C. typhae*, and hypothesizing that  
501 recombination, and consequently segregation during the first division, may arise either between  
502 identical or between homologous chromosomes, some intermediate situations are expected. Once  
503 again, it does not reconcile the clear-cut figure we observe with individuals entirely heterozygous  
504 suggesting zero recombination between homologs and individuals for which recombination is  
505 observed for almost all homologs. If different mechanisms truly co-occur to produce females in an  
506 asexual way, it could reflect an accidental phenomenon arising from the relaxed control of sexual  
507 reproduction as observed in the honey bee (Aamidor et al., 2018). To better understand the  
508 mechanism underlying thelytoky in *C. typhae*, a cytological approach of meiosis and parthenogenesis  
509 would be necessary.

510 Despite the lack of a unified mechanism to explain the genotypic profile observed in the F2 progenies  
511 obtained, we can confirm that recombination occurred in at least 6 out of 9 cases, and that these  
512 recombination events were as frequent as those observed in sexual reproduction (Benoist et al.,  
513 2020a). By contrast, severe reductions of recombination rates were observed associated with  
514 parthenogenetic reproduction in the literature. For example, recombination in thelytokous workers is  
515 reduced by up to 10-fold in comparison to their sexually reproducing mothers in the Cape bee, *Apis*  
516 *mellifera capensis*, the social parasite of honeybee which reproduces parthenogenetically *via*  
517 automixis with central fusion (Baudry et al., 2004). In the little fire ant *Wasmannia auropunctata*,  
518 sexual populations coexist with asexual populations in which reproductive queens are produced by  
519 automictic parthenogenesis with central fusion. In asexual populations, recombination rate is  
520 reduced by a factor of 45 compared to the sexual populations (Rey et al., 2011). The reduction of  
521 recombination rate is assumed to mitigate the potential deleterious impact of thelytoky: under  
522 automixis with central fusion, heterozygosity is preserved unless recombination occurs (Figure 1). In  
523 species affected by inbreeding depression, a homozygosity increase would be detrimental and could  
524 be advantageously limited by a low recombination rate. As the molecular mechanisms involved in  
525 thelytoky and recombination are probably distinct, the situation observed in the Cape bee and little

526 fire ant may result from a long-term evolutionary process. If the phenomenon described in *C. typhae*  
527 is recent, it may explain the unchanged recombination rate.

528 Otherwise, the inbreeding impact could be meaningless in *C. typhae*. Hymenoptera are haplodiploid  
529 and could thus be less sensitive to inbreeding because most of the deleterious alleles are purged at  
530 the haploid state in males (Hedrick and Parker, 1997; Henter, 2003). However, their sex  
531 determination system may be highly compelling regarding homozygosity and ability to reproduce *via*  
532 thelytoky (Vorburger, 2014). The most common, and likely ancestral, sex determination system is  
533 governed by the genotype at one (sl-CSD: single locus Complementary Sex Determination) or few loci  
534 (ml-CSD: multi locus CSD) (Heimpel and de Boer, 2008). Under such a determinism, individuals that  
535 are heterozygous at least at one of these CSD loci develop as diploid females while hemizygous or  
536 homozygous individuals at all CSD loci develop as haploid or diploid males respectively. In most  
537 hymenopteran species, diploid males have a low survival rate and/or are often sterile. Enhanced  
538 homozygosity due to thelytoky may be very costly when it results in diploid male production (de Boer  
539 et al., 2015, 2012; van Wilgenburg et al., 2006; Zhou et al., 2007). Other sex determination systems  
540 that are less sensitive to homozygosity have been described in Hymenoptera, such as Paternal  
541 Genome Elimination (Heimpel and de Boer, 2008) or genome imprinting, described in *Nasonia*  
542 *vitripennis* (van de Zande and Verhulst, 2014). The mechanism of sex determination is unknown in *C.*  
543 *typhae*. However, it has been reared for more than 80 generations in laboratory conditions starting  
544 from an isofemale line and seems poorly sensitive to homozygosity increase.

545 The bacterial origin of thelytoky in *C. typhae* could not be either confirmed or completely discarded  
546 in the present study as an intermediate state (in terms of frequency of parthenogenesis) was  
547 observed following antibiotic treatment. The knowledge of the genetic mechanism could give some  
548 clues about the origin of parthenogenesis as endosymbionts have been mainly shown to favour  
549 gamete duplication. However, detailing specific interactions reveals a more complex picture.  
550 *Cardinium* is able to feminize diploid males (Giorgini et al., 2009) but also to induce automixis with  
551 central fusion (Zchori-Fein and Perlman, 2004). *Wolbachia* is mainly known to induce gamete  
552 duplication (Leach et al., 2009; Ma and Schwander, 2017) but it has also been described to promote  
553 apomixis (Weeks and Breeuwer, 2001). *Rickettsia* has also been shown to trigger functional apomixis  
554 (Adachi-Hagimori et al., 2008). Furthermore, the list of endosymbionts is probably partial and in most  
555 of the documented examples of parthenogenesis endosymbiotically determined, the cytological  
556 mechanism remains unknown. Evidence that microorganisms can promote all processes of  
557 parthenogenesis will probably arise from future research. The examples of demonstrated genetic  
558 determinism of thelytoky are rare and only concern automixis with central fusion. This is the case for  
559 the Cape honey bee (Verma and Ruttner, 1983) and for the wasp *Venturia canescens* (Beukeboom  
560 and Pijnacker, 2000). However, Tsutsui et al., (2014) described an apomixis mechanism in the  
561 parasitoid wasp *Meteorus pulchricornis* for which they proposed a genetic origin of thelytoky. Even  
562 more than for endosymbiont origin, genetic determinism of parthenogenesis requires thorough  
563 investigations to determine whether it is restricted to a few cytological mechanisms. Anyway, the  
564 clearly evidenced mechanism of automixis with central fusion in *C. typhae* does not allow to settle  
565 between genetic and endosymbiont origin as this mechanism is common to both situations.

566

## 567 **Conclusion**

568 In this study, we described an unusual example of low frequency thelytokous reproduction within a  
569 sexually reproducing species. We demonstrated that this asexual reproduction is likely the result of  
570 different mechanisms and occurs even in the progeny of fertilized females, an undescribed

571 phenomenon to our knowledge. As most studies on asexual reproduction focus on obligate or cyclical  
572 situations, we may wonder whether such low frequency and probably accidental thelytoky is  
573 common but until now mostly undetected among sexually reproductive species. It is well known that  
574 asexuality has emerged many times in numerous lineages. If the occurrence of accidental  
575 parthenogenesis turns out to be usual, it could represent the first step of evolutionary trajectories  
576 favoured either by reproductive or ecological advantages of asexual lineages.

577

## 578 **Acknowledgments**

579 The present work has benefited from the I2BC Cytometry platform (Université Paris-Saclay, CEA,  
580 CNRS, Institute for Integrative Biology of the Cell (I2BC), 91198, Gif-sur-Yvette, France) with the help  
581 of Mickaël Bourge. We thank Rémi Jeannette and Sylvie Nortier for insect rearing at Gif, and Daniel  
582 Couch for proofreading.

583 This work was supported by the French National Research Agency (project Cotebio ANR-17-CE32-  
584 0015), and by the authors' operating grants from IRD, CNRS and *icipe*. R. Benoist was funded by the «  
585 Ecole doctorale 227 MNHN-UPMC Sciences de la Nature et de l'Homme: évolution et écologie ».

586 All experimentations were realized under the juridical frame of a Material Transfer Agreement signed  
587 between IRD, icipe and CNRS (CNRS 072057/IRD 302227/00) and the authorization to import *Cotesia*  
588 in France delivered by the DRIAAF of Ile de France (IDF 2017-OI-26-032).

589 We thank Christoph Haag, Jens Bast and Michael Lattorff for their constructive comments that  
590 helped us improve this paper.

591

## 592 **Data availability**

593 Raw data for Figure 2, and Tables 1, 3 and 4 are available at <https://zenodo.org/record/6420801>

594

## 595 **References**

596 Aamidor, S.E., Yagound, B., Ronai, I., Oldroyd, B.P., 2018. Sex mosaics in the honeybee: how  
597 haplodiploidy makes possible the evolution of novel forms of reproduction in social Hymenoptera.  
598 *Biol. Lett.* 14, 20180670. <https://doi.org/10.1098/rsbl.2018.0670>

599 Adachi-Hagimori, T., Miura, K., Stouthamer, R., 2008. A new cytogenetic mechanism for bacterial  
600 endosymbiont-induced parthenogenesis in Hymenoptera. *Proc. R. Soc. B.* 275, 2667–2673.  
601 <https://doi.org/10.1098/rspb.2008.0792>

602 Archetti, M., 2022. Evidence from automixis with inverted meiosis for the maintenance of sex by loss  
603 of complementation. *J of Evolutionary Biology* 35, 40–50. <https://doi.org/10.1111/jeb.13975>

604 Archetti, M., 2010. Complementation, Genetic Conflict, and the Evolution of Sex and Recombination.  
605 *Journal of Heredity* 101, S21–S33. <https://doi.org/10.1093/jhered/esq009>

606 Ball, S.L., 2001. Tycho parthenogenesis and mixed mating in natural populations of the mayfly  
607 *Stenonema femoratum*. *Heredity* 87, 373–380.

- 608 Baudry, E., Kryger, P., Allsopp, M., Koeniger, N., Vautrin, D., Mougél, F., Cornuet, J.M., Solignac, M.,  
609 2004. Whole-Genome Scan in Thelytokous-Laying Workers of the Cape Honeybee (*Apis mellifera*  
610 *capensis*): Central Fusion, Reduced Recombination Rates and Centromere Mapping Using Half-Tetrad  
611 Analysis. *Genetics* 252, 243–252.
- 612 Benoist, R., Capdevielle-Dulac, C., Chantre, C., Jeannette, R., Calatayud, P., Drezen, J., Dupas, S., Le  
613 Rouzic, A., Le Ru, B., Moreau, L., Van Dijk, E., Kaiser, L., Mougél, F., 2020a. Quantitative trait loci  
614 involved in the reproductive success of a parasitoid wasp. *Mol Ecol* 29, 3476–3493.  
615 <https://doi.org/10.1111/mec.15567>
- 616 Benoist, R., Chantre, C., Capdevielle-Dulac, C., Bodet, M., Mougél, F., Calatayud, P.A., Dupas, S.,  
617 Huguet, E., Jeannette, R., Obonyo, J., Odorico, C., Silvain, J.F., Le Ru, B., Kaiser, L., 2017. Relationship  
618 between oviposition, virulence gene expression and parasitism success in *Cotesia typhae* nov. sp.  
619 parasitoid strains. *Genetica* 145, 469–479. <https://doi.org/10.1007/s10709-017-9987-5>
- 620 Benoist, R., Paquet, S., Decourcelle, F., Guez, J., Jeannette, R., Calatayud, P.-A., Le Ru, B., Mougél, F.,  
621 Kaiser, L., 2020b. Role of egg-laying behavior, virulence and local adaptation in a parasitoid's chances  
622 of reproducing in a new host. *Journal of Insect Physiology* 120, 103987.  
623 <https://doi.org/10.1016/j.jinsphys.2019.103987>
- 624 Beukeboom, L.W., Pijnacker, L.P., 2000. Automictic parthenogenesis in the parasitoid *Venturia*  
625 *canescens* (Hymenoptera: Ichneumonidae) revisited 43, 6.
- 626 Boivin, G., 2013. Sperm as a limiting factor in mating success in Hymenoptera parasitoids. *Entomol*  
627 *Exp Appl* 146, 149–155. <https://doi.org/10.1111/j.1570-7458.2012.01291.x>
- 628 Bourge, M., Brown, S.C., Siljak-Yakovlev, S., 2018. Flow cytometry as tool in plant sciences, with  
629 emphasis on genome size and ploidy level assessment. *Genetics & Applications* 2, 1–12.
- 630 Branca, A., Le Ru, B., Calatayud, P.-A., Obonyo, J., Musyoka, B., Capdevielle-Dulac, C., Kaiser-Arnauld,  
631 L., Silvain, J.-F., Gauthier, J., Paillusson, C., Gayral, P., Herniou, E.A., Dupas, S., 2019. Relative  
632 Influence of Host, Wolbachia, Geography and Climate on the Genetic Structure of the Sub-saharan  
633 Parasitic Wasp *Cotesia sesamiae*. *Front. Ecol. Evol.* 7, 309. <https://doi.org/10.3389/fevo.2019.00309>
- 634 Casiraghi, M., Bordenstein, S.R., Baldo, L., Lo, N., Beninati, T., Wernegreen, J.J., Werren, J.H., Bandi,  
635 C., 2005. Phylogeny of *Wolbachia pipientis* based on *gltA*, *groEL* and *ftsZ* gene sequences: clustering  
636 of arthropod and nematode symbionts in the F supergroup, and evidence for further diversity in the  
637 *Wolbachia* tree. *Microbiology* 151, 4015–4022. <https://doi.org/10.1099/mic.0.28313-0>
- 638 Chapman, N.C., Beekman, M., Allsopp, M.H., Rinderer, T.E., Lim, J., Oxley, P.R., Oldroyd, B.P., 2015.  
639 Inheritance of thelytoky in the honey bee *Apis mellifera capensis*. *Heredity* 114, 584–592.  
640 <https://doi.org/10.1038/hdy.2014.127>
- 641 Collet, M., Amat, I., Sauzet, S., Auguste, A., Fauvergue, X., Mouton, L., Desouhant, E., 2020. Insects  
642 and incest: Sib-mating tolerance in natural populations of a parasitoid wasp. *Mol Ecol* 29, 596–609.  
643 <https://doi.org/10.1111/mec.15340>
- 644 de Boer, J.G., Groenen, M.A., Pannebakker, B.A., Beukeboom, L.W., Kraus, R.H., 2015. Population-  
645 level consequences of complementary sex determination in a solitary parasitoid. *BMC Evol Biol* 15,  
646 98. <https://doi.org/10.1186/s12862-015-0340-2>

- 647 de Boer, J.G., Kuijper, B., Heimpel, G.E., Beukeboom, L.W., 2012. Sex determination meltdown upon  
648 biological control introduction of the parasitoid *Cotesia rubecula*? *Evol Appl* 5, 444–454.  
649 <https://doi.org/10.1111/j.1752-4571.2012.00270.x>
- 650 Dwight, Z.L., Palais, R., Wittwer, C.T., 2012. uAnalyze: Web-Based High-Resolution DNA Melting  
651 Analysis with Comparison to Thermodynamic Predictions. *IEEE/ACM Trans. Comput. Biol. and Bioinf.*  
652 9, 1805–1811. <https://doi.org/10.1109/TCBB.2012.112>
- 653 Foray, V., Helene, H., Martinez, S., Gibert, P., Desouhant, E., 2013. Occurrence of arrhenotoky and  
654 thelytoky in a parasitic wasp *Venturia canescens* (Hymenoptera: Ichneumonidae): Effect of  
655 endosymbionts or existence of two distinct reproductive modes? *Eur. J. Entomol.* 110, 103–107.  
656 <https://doi.org/10.14411/eje.2013.014>
- 657 Giorgini, M., Monti, M.M., Caprio, E., Stouthamer, R., Hunter, M.S., 2009. Feminization and the  
658 collapse of haplodiploidy in an asexual parasitoid wasp harboring the bacterial symbiont *Cardinium*.  
659 *Heredity* 102, 365–371. <https://doi.org/10.1038/hdy.2008.135>
- 660 Gloag, R., Remnant, E.J., Oldroyd, B.P., 2019. The frequency of thelytokous parthenogenesis in  
661 European-derived *Apis mellifera* virgin queens. *Apidologie* 50, 295–303.  
662 <https://doi.org/10.1007/s13592-019-00649-0>
- 663 Gokhman, V.E., Kuznetsova, V.G., 2018. Parthenogenesis in Hexapoda: holometabolous insects. *J*  
664 *Zool Syst Evol Res* 56, 23–34. <https://doi.org/10.1111/jzs.12183>
- 665 Gu, H., Dorn, S., 2003. Mating system and sex allocation in the gregarious parasitoid *Cotesia*  
666 *glomerata*. *Animal Behaviour* 66, 259–264. <https://doi.org/10.1006/anbe.2003.2185>
- 667 Hedrick, P.W., Parker, J.D., 1997. Evolutionary Genetics and Genetic Variation of Haplodiploids and X-  
668 Linked Genes. *Annu. Rev. Ecol. Syst.* 28, 55–83. <https://doi.org/10.1146/annurev.ecolsys.28.1.55>
- 669 Heimpel, G.E., de Boer, J.G., 2008. Sex determination in the hymenoptera. *Annual review of*  
670 *entomology* 53, 209–30. <https://doi.org/10.1146/annurev.ento.53.103106.093441>
- 671 Henter, H.J., 2003. INBREEDING DEPRESSION AND HAPLODIPLOIDY: EXPERIMENTAL MEASURES IN A  
672 PARASITOID AND COMPARISONS ACROSS DIPLOID AND HAPLODIPLOID INSECT TAXA. *Evolution* 57,  
673 1793–1803. <https://doi.org/10.1111/j.0014-3820.2003.tb00587.x>
- 674 Jarosch, A., Stolle, E., Crewe, R.M., Moritz, R.F.A., 2011. Alternative splicing of a single transcription  
675 factor drives selfish reproductive behavior in honeybee workers (*Apis mellifera*). *Proceedings of the*  
676 *National Academy of Sciences* 108, 15282–15287. <https://doi.org/10.1073/pnas.1109343108>
- 677 Kaiser, L., Fernandez-Triana, J., Capdevielle-Dulac, C., Chantre, C., Bodet, M., Kaoula, F., Benoist, R.,  
678 Calatayud, P.-A., Dupas, S., Herniou, E.A., Jeannette, R., Obonyo, J., Silvain, J.-F., Le Ru, B., 2017.  
679 Systematics and biology of *Cotesia typhae* sp. n. (Hymenoptera, Braconidae, Microgastrinae), a  
680 potential biological control agent against the noctuid Mediterranean corn borer, *Sesamia*  
681 *nonagrioides*. *ZK* 682, 105–136. <https://doi.org/10.3897/zookeys.682.13016>
- 682 Kaiser, L., Le Ru, B.P., Kaoula, F., Paillusson, C., Capdevielle-Dulac, C., Obonyo, J.O., Herniou, E.A.,  
683 Jancek, S., Branca, A., Calatayud, P., Silvain, J., Dupas, S., 2015. Ongoing ecological speciation in  
684 *Cotesia sesamiae*, a biological control agent of cereal stem borers. *Evol Appl* 8, 807–820.  
685 <https://doi.org/10.1111/eva.12260>



- 686 Lattorff, H.M.G., Moritz, R.F.A., Fuchs, S., 2005. A single locus determines thelytokous  
687 parthenogenesis of laying honeybee workers (*Apis mellifera capensis*). *Heredity* 94, 533–537.  
688 <https://doi.org/10.1038/sj.hdy.6800654>
- 689 Leach, I.M., Pannebakker, B.A., Schneider, M.V., Driessen, G., van de Zande, L., Beukeboom, L.W.,  
690 2009. Thelytoky in Hymenoptera with *Venturia canescens* and *Leptopilina clavipes* as Case Studies,  
691 in: Schön, I., Martens, K., Dijk, P. (Eds.), *Lost Sex*. Springer Netherlands, Dordrecht, pp. 347–375.  
692 [https://doi.org/10.1007/978-90-481-2770-2\\_17](https://doi.org/10.1007/978-90-481-2770-2_17)
- 693 Liegeois, M., Sartori, M., Schwander, T., 2021. Extremely Widespread Parthenogenesis and a Trade-  
694 Off Between Alternative Forms of Reproduction in Mayflies (Ephemeroptera). *Journal of Heredity*  
695 112, 45–57. <https://doi.org/10.1093/jhered/esaa027>
- 696 Little, C.J., Chapuis, M.-P., Blondin, L., Chapuis, E., Jourdan-Pineau, H., 2017. Exploring the  
697 relationship between tytoparthenogenesis and inbreeding depression in the Desert Locust,  
698 *Schistocerca gregaria*. *Ecol Evol* 7, 6003–6011. <https://doi.org/10.1002/ece3.3103>
- 699 Liu, Q., Zhou, J., Zhang, C., Ning, S., Duan, L., Dong, H., 2019. Co-occurrence of thelytokous and  
700 bisexual *Trichogramma dendrolimi* Matsumura (Hymenoptera: Trichogrammatidae) in a natural  
701 population. *Sci Rep* 9, 17480. <https://doi.org/10.1038/s41598-019-53992-8>
- 702 Ma, W.-J., Schwander, T., 2017. Patterns and mechanisms in instances of endosymbiont-induced  
703 parthenogenesis. *J. Evol. Biol.* 30, 868–888. <https://doi.org/10.1111/jeb.13069>
- 704 Mackensen, O., 1943. The Occurrence of Parthenogenetic Females in Some Strains of Honeybees.  
705 *Journal of Economic Entomology* 36, 465–467. <https://doi.org/10.1093/jee/36.3.465>
- 706 Meirmans, S., Meirmans, P.G., Kirkendall, L.R., 2012. The Costs Of Sex: Facing Real-world  
707 Complexities. *The Quarterly Review of Biology* 87, 19–40. <https://doi.org/10.1086/663945>
- 708 Mochiah, M.B., Ngi-Song, A.J., Overholt, W.A., Stouthamer, R., 2002. *Wolbachia* infection in *Cotesia*  
709 *sesamiae* (Hymenoptera: Braconidae) causes cytoplasmic incompatibility: implications for biological  
710 control. *Biological Control* 25, 74–80. [https://doi.org/10.1016/S1049-9644\(02\)00045-2](https://doi.org/10.1016/S1049-9644(02)00045-2)
- 711 Morgan-Richards, M., Treweek, S.A., 2005. Hybrid origin of a parthenogenetic genus? *Molecular*  
712 *Ecology* 14, 2133–2142. <https://doi.org/10.1111/j.1365-294X.2005.02575.x>
- 713 Neiman, M., Sharbel, T.F., Schwander, T., 2014. Genetic causes of transitions from sexual  
714 reproduction to asexuality in plants and animals. *J. Evol. Biol.* 27, 1346–1359.  
715 <https://doi.org/10.1111/jeb.12357>
- 716 Neumann, P., 2001. Social parasitism by honeybee workers (*Apis mellifera capensis* Escholtz): host  
717 finding and resistance of hybrid host colonies. *Behavioral Ecology* 12, 419–428.  
718 <https://doi.org/10.1093/beheco/12.4.419>
- 719 Otto, S.P., 2009. The Evolutionary Enigma of Sex. *The American Naturalist* 174, S1–S14.  
720 <https://doi.org/10.1086/599084>
- 721 Pardo, M.C., López-León, M.D., Cabrero, J., Camacho, J.P.M., 1995. Cytological and developmental  
722 analysis of tytoparthenogenesis in *Locusta migratoria*. *Heredity* 75, 485–494.  
723 <https://doi.org/10.1038/hdy.1995.165>



- 724 Pijls, J.W.A.M., van Steenbergen, H.J., van Alphen, J.J.M., 1996. Asexuality cured: the relations and  
725 differences between sexual and asexual *Apoanagyrus diversicornis*. *Heredity* 76, 506–513.  
726 <https://doi.org/10.1038/hdy.1996.73>
- 727 Rabeling, C., Kronauer, D.J.C., 2013. Thelytokous Parthenogenesis in Eusocial Hymenoptera. *Annu.*  
728 *Rev. Entomol.* 58, 273–292. <https://doi.org/10.1146/annurev-ento-120811-153710>
- 729 Rey, O., Loiseau, A., Facon, B., Foucaud, J., Orivel, J., Cornuet, J.-M., Robert, S., Dobigny, G., Delabie,  
730 J.H.C., Mariano, C.D.S.F., Estoup, A., 2011. Meiotic Recombination Dramatically Decreased in  
731 Thelytokous Queens of the Little Fire Ant and Their Sexually Produced Workers. *Molecular Biology*  
732 *and Evolution* 28, 2591–2601. <https://doi.org/10.1093/molbev/msr082>
- 733 Sandrock, C., Vorburger, C., 2011. Single-Locus Recessive Inheritance of Asexual Reproduction in a  
734 Parasitoid Wasp. *Current Biology* 21, 433–437. <https://doi.org/10.1016/j.cub.2011.01.070>
- 735 Schneider, M.V., Beukeboom, L.W., Driessen, G., Lapchin, L., Bernstein, C., Van Alphen, J.J.M., 2002.  
736 Geographical distribution and genetic relatedness of sympatrical thelytokous and arrhenotokous  
737 populations of the parasitoid *Venturia canescens* (Hymenoptera): Thelytoky and arrhenotoky in  
738 *Venturia canescens*. *Journal of Evolutionary Biology* 15, 191–200. <https://doi.org/10.1046/j.1420-9101.2002.00394.x>
- 740 Song, Y., Scheu, S., Drossel, B., 2012. The ecological advantage of sexual reproduction in multicellular  
741 long-lived organisms: The ecological advantage of sexual reproduction. *Journal of Evolutionary*  
742 *Biology* 25, 556–565. <https://doi.org/10.1111/j.1420-9101.2012.02454.x>
- 743 Stouthamer, R., Pinto, J.D., Platner, G.R., Luck, R.F., 1990. Taxonomic Status of Thelytokous Forms of  
744 *Trichogramma* (Hymenoptera: Trichogrammatidae). *Annals of the Entomological Society of America*  
745 83, 475–481. <https://doi.org/10.1093/aesa/83.3.475>
- 746 The Tree of Sex Consortium, 2014. Tree of Sex: A database of sexual systems. *Sci Data* 1, 140015.  
747 <https://doi.org/10.1038/sdata.2014.15>
- 748 Tsutsui, Y., Maeto, K., Hamaguchi, K., Isaki, Y., Takami, Y., Naito, T., Miura, K., 2014. Apomictic  
749 parthenogenesis in a parasitoid wasp *Meteorus pulchricornis*, uncommon in the haplodiploid order  
750 Hymenoptera. *Bull. Entomol. Res.* 104, 307–313. <https://doi.org/10.1017/S0007485314000017>
- 751 Tucker, K.W., 1958. AUTOMIC TIC PARTHENOGENESIS IN THE HONEY BEE. *Genetics* 43, 299–316.  
752 <https://doi.org/10.1093/genetics/43.3.299>
- 753 Tvedte, E.S., Logsdon, J.M., Forbes, A.A., 2019. Sex loss in insects: causes of asexuality and  
754 consequences for genomes. *Current Opinion in Insect Science* 31, 77–83.  
755 <https://doi.org/10.1016/j.cois.2018.11.007>
- 756 van de Zande, L., Verhulst, E.C., 2014. Genomic Imprinting and Maternal Effect Genes in Haplodiploid  
757 Sex Determination. *Sex Dev* 8, 74–82. <https://doi.org/10.1159/000357146>
- 758 van der Kooij, C.J., Matthey-Doret, C., Schwander, T., 2017. Evolution and comparative ecology of  
759 parthenogenesis in haplodiploid arthropods. *Evolution Letters* 1, 304–316.  
760 <https://doi.org/10.1002/evl3.30>
- 761 van Wilgenburg, E., Driessen, G., Beukeboom, L., 2006. Single locus complementary sex  
762 determination in Hymenoptera: an “unintelligent” design? *Front Zool* 3, 1.  
763 <https://doi.org/10.1186/1742-9994-3-1>

- 764 van der Kooij, C.J., Schwander, T., 2015. Parthenogenesis: Birth of a New Lineage or Reproductive  
765 Accident? *Current Biology* 25, R659–R661. <https://doi.org/10.1016/j.cub.2015.06.055>
- 766 Verma, S., Ruttner, F., 1983. Cytological analysis of the thelytokous parthenogenesis in the Cape  
767 honeybee (*Apis mellifera capensis* Escholtz). *Apidologie* 14, 41–57.  
768 <https://doi.org/10.1051/apido:19830104>
- 769 Vershinina, A.O., Kuznetsova, V.G., 2016. Parthenogenesis in Hexapoda: Entognatha and non-  
770 holometabolous insects. *J Zoolog Syst Evol Res* 54, 257–268. <https://doi.org/10.1111/jzs.12141>
- 771 Vorburger, C., 2014. Thelytoky and Sex Determination in the Hymenoptera: Mutual Constraints. *Sex*  
772 *Dev* 8, 50–58. <https://doi.org/10.1159/000356508>
- 773 Weeks, A.R., Breeuwer, J.A.J., 2001. *Wolbachia* -induced parthenogenesis in a genus of  
774 phytophagous mites. *Proc. R. Soc. Lond. B* 268, 2245–2251. <https://doi.org/10.1098/rspb.2001.1797>
- 775 Whiting, P.W., 1945. The Evolution of Male Haploidy. *The Quarterly Review of Biology* 20, 231–260.  
776 <https://doi.org/10.1086/394884>
- 777 Zchori-Fein, E., Perlman, S.J., 2004. Distribution of the bacterial symbiont *Cardinium* in arthropods:  
778 *Molecular Ecology* 13, 2009–2016. <https://doi.org/10.1111/j.1365-294X.2004.02203.x>
- 779 Zhou, Y., Gu, H., Dorn, S., 2007. Effects of inbreeding on fitness components of *Cotesia glomerata*, a  
780 parasitoid wasp with single-locus complementary sex determination (sl-CSD). *Biological Control* 40,  
781 273–279. <https://doi.org/10.1016/j.biocontrol.2006.11.002>
- 782
