# 1 Spontaneous parthenogenesis in the parasitoid wasp *Cotesia typhae*: low 2 frequency anomaly or evolving process?

3 Claire Capdevielle Dulac<sup>1, \*</sup>, Romain Benoist<sup>1</sup>, Sarah Paquet<sup>1</sup>, Paul-André Calatayud<sup>1</sup>, Julius Obonyo<sup>2</sup>,  
4 Laure Kaiser<sup>1</sup>, Florence Mougel<sup>1</sup>

5  
6 <sup>1</sup> Université Paris-Saclay, CNRS, IRD, UMR Évolution, Génomes, Comportement et Écologie, 91198, Gif-sur-  
7 Yvette, France.

8 <sup>2</sup> *icipe*, International Center of Insect Physiology and Ecology, P.O. Box 30772-00100, Nairobi, Kenya

9  
10 \* Corresponding author: [claire.capdevielle-dulac@egce.cnrs-gif.fr](mailto:claire.capdevielle-dulac@egce.cnrs-gif.fr)  
11

## 12 Abstract

13 Hymenopterans are haplodiploids and unlike most other Arthropods they do not possess sexual  
14 chromosomes. Sex determination typically happens via the ploidy of individuals: haploids become  
15 males and diploids become females. Arrhenotoky is believed to be the ancestral reproduction mode  
16 in Hymenopterans, with haploid males produced parthenogenetically, and diploid females produced  
17 sexually. However, a number of transitions towards thelytoky (diploid females produced  
18 parthenogenetically) have appeared in Hymenopterans, and in most cases populations or species are  
19 either totally arrhenotokous or totally thelytokous. Here we present the case of *Cotesia typhae*  
20 (Fernandez-Triana), a Braconidae that produces parthenogenetic females at a low frequency. The  
21 phenotyping of two laboratory strains and one natural population showed that this frequency is  
22 variable, and that this rare thelytokous phenomenon also happens in the wild. Moreover, mated  
23 females from one of the laboratory strains produce a few parthenogenetic daughters among a  
24 majority of sexual daughters. The analysis of daughters of heterozygous virgin females allowed us to  
25 show that a mechanism of automixis with central fusion is very likely at play in *C. typhae*. This  
26 mechanism allows some parts of the genome to remain heterozygous, especially at the  
27 chromosomes' centromeres, which can be advantageous depending on the sex determination  
28 system involved. Lastly, in most species, the origin of thelytoky is either bacterial or genetic, and an  
29 antibiotic treatment as well as PCR experiments did not demonstrate a bacterial cause in *C. typhae*.  
30 The unusual case of low parthenogenetic frequency described in this species constitutes another  
31 example of the fascinating diversity of sex determination systems in Arthropods.

## 33 Introduction

34 Sexual reproduction is the most widespread reproductive strategy among pluricellular organisms and  
35 especially in animals. In contrast with its predominance, this reproductive mode appears costly due,  
36 for instance, to the necessity to detect and attract a partner, escape sexually transmitted diseases or  
37 avoid predation during mating. Because they share parenthood with their mate, sexual individuals  
38 transmit two-fold less their genetic material to their progeny compared to asexual counterparts. The  
39 ubiquity of sex despite such disadvantages led to the definition of the so-called "paradox of sex"  
40 (Meirmans et al., 2012; Otto, 2009).

41 Numerous cases of evolution toward asexual reproduction or parthenogenesis have been reported,  
42 notably within arthropod taxa (The Tree of Sex Consortium, 2014). Parthenogenesis can produce  
43 either males (arrhenotoky) or females (thelytoky) from unfertilized eggs, but only the last case  
44 strictly coincides with asexual reproduction. It is also referred to as parthenogenesis *sensu stricto*.

45 Thelytoky has been observed in almost all basal Hexapoda and non-holometabolous insect taxa  
46 (Vershina and Kuznetsova, 2016) as well as in many holometabolous insect species (Gokhman and  
47 Kuznetsova, 2018). This wide taxonomic range illustrates the frequent transition from sexual to  
48 asexual taxa that arose independently in various lineages. This scattered distribution hides a global  
49 low percentage of parthenogenesis: thelytokous species represent less than 1% of the Hexapoda  
50 (Gokhman and Kuznetsova, 2018). The proportion of asexual lineages is also highly heterogenous  
51 among taxa. Liegeois et al. (2021) detected frequencies between 0 and 6.7% among families of  
52 mayflies. Van der Kooij et al. (2017) reported frequencies ranging from 0 to 38% among genera of  
53 haplodiploid arthropods.

54 Transition from sexual to asexual reproductive mode requires bypassing genetic and developmental  
55 constraints, a challenge that may be easier to face in some taxa. In most species with a haplodiploid  
56 sex determination system, males develop from unfertilized eggs and are haploid while females  
57 develop from fertilized eggs leading to a diploid state. In such cases, embryonic development is  
58 initiated independently from egg fertilization, a trait probably favoring the evolution toward  
59 thelytoky (Vorbürger, 2014). The variable frequency of asexual reproduction even among  
60 haplodiploid lineages indicates that other factors allowing the transition toward this reproductive  
61 mode remain to be identified (van der Kooij et al., 2017).

62 The multiple and independent acquisitions of asexual reproduction are associated with numerous  
63 mechanisms to restore diploid state and produce females (Rabeling and Kronauer, 2013; Vorbürger,  
64 2014), illustrated in figure 1B. Apomixis is based on mitosis and induces clonal reproduction. The  
65 same clonal issue may also occur when endoreplication precedes meiosis, resulting in recombination  
66 between identical chromosomes (Ma and Schwander, 2017). In automixis, meiosis occurs and is  
67 followed by different diploid restoration processes. Two meiosis products may assemble to generate  
68 a diploid cell: i) fusion of non-sister products separated during the first *reductional* division in central  
69 fusion or ii) fusion of sister cells produced during the second *equational* division in terminal fusion.  
70 The restoration of diploidy may also result from gamete duplication involving either fusion of mitosis  
71 products or chromosomal replication without cellular division. In some lineages, the restoration of  
72 diploidy may operate during embryogenesis *via* endomitosis (Little et al., 2017; Pardo et al., 1995).  
73 The consequences of thelytoky in terms of heterozygosity are variable depending on the mechanism:  
74 from complete homozygosity in one generation under gamete duplication to completely preserved  
75 heterozygosity in apomixis, with intermediate levels of homozygosity in terminal and central fusion.  
76 According to the biology of species and to the necessity to maintain heterozygosity, each mechanism  
77 may be favored or not.

78 Three main origins of thelytoky have been described: hybridization, bacterial endosymbiosis and  
79 genetic mutation (Tvedte et al., 2019). Hybridization, joining genomes from two distinct species,  
80 leads to improper chromosome pairing and dysfunctional meiosis that may promote asexuality  
81 (Morgan-Richards and Trewick, 2005). Endosymbiotic origin is the most widely studied cause of  
82 parthenogenesis (Ma and Schwander, 2017). Up to date, only bacteria have been evidenced as  
83 parthenogenesis inducers, but it is likely that other microorganisms could be involved. Most of the  
84 described causative agents belong to the genera *Wolbachia*, *Rickettsia* and *Cardinium*,  
85 endosymbionts also known to induce cytoplasmic incompatibility or feminization of male embryos.  
86 The particularity of endosymbiont induced parthenogenesis resides in its partial or total reversibility.  
87 Thelytokous species treated with antibiotics or heat may revert to sexual reproduction, although  
88 often performing less well than true sexual counterparts (Stouthamer et al., 1990). The genetic origin  
89 of thelytoky has often been suggested when antibiotic or heat treatment had no effect, but the  
90 precise identification of loci responsible for parthenogenesis has only been conducted in a few

91 species (Chapman et al., 2015; Jarosch et al., 2011; Lattorff et al., 2005; Sandrock and Vorburger,  
92 2011).

93 The frequency of thelytoky within species also varies between taxa (Gokhman and Kuznetsova, 2018;  
94 Vershinina and Kuznetsova, 2016). Some species are described as obligate thelytokous when this  
95 mode of reproduction is the only one observed. Alternatively, thelytoky appears cyclic in some  
96 species where asexual generations alternate with sexual ones (Neiman et al., 2014). In other cases,  
97 polymorphism in the reproductive mode is observed either between populations (Foray et al., 2013;  
98 Leach et al., 2009) or within populations (Liu et al., 2019). Even in such polymorphic situations,  
99 thelytokous females produce female only progeny, albeit low frequency of males may be reported  
100 allowing to maintain rare events of sexual reproduction (Pijls et al., 1996).

101 Spontaneous occurrence of parthenogenesis has also been described in species reproducing via a  
102 sexual mode and qualified as tytoparthenogenesis (Ball, 2001; Pardo et al., 1995).  
103 Tytoparthenogenesis is characterized by a low hatching rate and a weak survival probability of the  
104 offspring (Little et al., 2017). It is typically considered as a dead-end accidental phenomenon in  
105 species adapted to sexual reproduction, although it may also correspond to an intermediate state in  
106 the evolution toward asexuality (van der Kooi and Schwander, 2015).

107 *Cotesia typhae* (Fernandez-Triana; Hymenoptera, Braconidae) is a gregarious endoparasitoid wasp  
108 native to Eastern Africa (Kaiser et al., 2017, 2015). It is specialized to one host, the corn stemborer  
109 *Sesamia nonagrioides* (Lefèbvre, Lepidoptera, Noctuidae). *Cotesia typhae* reproduces sexually and  
110 fertilized females typically lay 70-100 eggs in the first host encountered, among which about 70%  
111 develop into females and 30% into males (Benoist et al., 2020b). At least in laboratory conditions,  
112 sister-brother mating (sib-mating) currently occurs indicating that inbreeding is not detrimental to  
113 this species. A genetic survey was conducted on this parasitoid wasp to compare two laboratory  
114 strains initiated from wild individuals sampled in two distant Kenyan localities, Kobodo and Makindu  
115 (Benoist et al., 2020a). The study led to the construction of a genetic map, based on crosses between  
116 the two strains. The phenotyping of the progenies obtained from these controlled crosses revealed  
117 an extremely variable sex-ratio, ranging from 100% to as low as 5% of females. Such a phenomenon  
118 could result from poorly mated females but also from rare thelytokous events in the progeny of  
119 unfertilized females. This last hypothesis was validated in a preliminary experiment allowing virgin  
120 females to oviposit. Among the numerous males emerging from the parasitized hosts, a few females  
121 were detected.

122 The aim of this study is to describe the low frequency thelytoky phenomenon in *Cotesia typhae*. We  
123 measured the percentage of females able to produce daughters parthenogenetically as well as the  
124 proportion of thelytokous daughters to arrhenotokous sons in their progeny. These ratios were  
125 obtained for both laboratory strains but also for the wild population from Kobodo. We measured the  
126 ploidy level of the thelytokous daughters to test whether they result from male feminization or from  
127 diploid restoration. Taking advantage of the available genetic map, we investigated the mechanism  
128 responsible for thelytoky. The identified markers were also used to detect the presence of  
129 thelytokous daughters in the progeny of fertilized females. Finally, we tested the endosymbiotic  
130 origin of thelytoky and its reversibility by supplying wasps with antibiotics for successive generations  
131 and testing for the presence of well-known endosymbionts using barcoding markers.

132

## 133 **Material and Methods**

### 134 **Biological material**

135 Two separate *Cotesia typhae* parasitoid strains were obtained from adults that emerged from  
136 naturally parasitized *Sesamia nonagrioides* caterpillars collected in the field at two localities in Kenya  
137 (Kobodo: 0.679S, 34.412E; West Kenya; 3 caterpillars collected in 2013 and Makindu: 2.278S,  
138 37.825E; South-East Kenya; 10 caterpillars collected in 2010-2011). Isofemale lines were initiated in  
139 2016 and inbred rearings have been subsequently kept for more than 80 generations at the  
140 Evolution, Génomes, Comportement et Ecologie laboratory (EGCE, Gif-sur-Yvette, France), where  
141 cross experiments and phenotyping were performed. The phenotyping of the wild population was  
142 performed on individuals that emerged from naturally parasitized *Sesamia nonagrioides* caterpillars  
143 collected in the field in 2020 at Kobodo (see above). The *S. nonagrioides* host strain used was  
144 initiated from caterpillars collected at Makindu (see above) and Kabaa (1.24S, 37.44E). The rearing  
145 protocol of *C. typhae* and *S. nonagrioides* is detailed in Benoist et al. (2020b).

146

#### 147 **Phenotyping the strains/populations for the thelytokous character**

148 In this study, the phenotyping consists of counting the number of males and females in the offspring  
149 of virgin females, to quantify the thelytoky phenomenon. To obtain virgin females, individual  
150 cocoons were isolated from cocoon masses and kept in tubes with a moistened cotton wool ball and  
151 a drop of honey at 27°C until the emergence of the adults. The virgin females were then each  
152 allowed to oviposit in one *S. nonagrioides* caterpillar, and the number of males and females in their  
153 offspring was counted after the development of the new *C. typhae* generation.

154

#### 155 **Flow cytometry for ploidy analysis**

156 Flow cytometry analysis was performed on one control female from a mixed cocoon mass (produced  
157 by a fertilized female), two control males, and five parthenogenetic females (produced by a virgin  
158 female), all coming from the Makindu laboratory strain, to determine their ploidy. The individuals  
159 were frozen in liquid nitrogen and processed in the Imagerie-Gif Platform of Institute for Integrative  
160 Biology of the Cell (I2BC), CNRS, Gif-sur-Yvette according to the protocol in (Bourge et al., 2018).

161

#### 162 **Fecundity assessment of parthenogenetic females**

163 Cocoon masses resulting from the eggs laid by *C. typhae* Makindu virgin females in *S. nonagrioides*  
164 caterpillars were divided in smaller cocoon packs to spot parthenogenetic females more easily  
165 among the males after the emergence of the adults. Adults were left together for one day with water  
166 and honey to allow mating, and eleven parthenogenetic females were then allowed to oviposit in *S.*  
167 *nonagrioides* caterpillars. After the emergence of the resulting offspring, the number of males and  
168 females was counted for each one of them and the sex-ratio was calculated for comparison with that  
169 obtained from fertilized females from the control Makindu laboratory strain.

170

#### 171 **Identifying the thelytoky mechanism in *Cotesia typhae***

172 To find out which thelytoky mechanism is at play in the *C. typhae* Makindu laboratory strain, virgin  
173 heterozygous females are needed to analyse the recombination patterns of their offspring. Indeed,  
174 according to the mechanism, the female offspring will be more or less heterozygous, as explained in  
175 introduction (Figure 1B). To obtain virgin heterozygous females, six controlled crosses were

176 performed between the Makindu and Kobodo laboratory strains, 3 in each direction (Figure 1A).  
177 Prior to this, cocoons had been isolated from masses of each strain, in order to obtain virgin males  
178 and females for the crosses. Cocoons were then isolated from the masses resulting from the crosses,  
179 leading to the emergence of virgin F1 heterozygous females. 57 of these females were allowed to  
180 oviposit in *S. nonagrioides* caterpillars, and the offspring of the 57 resulting cocoon masses were  
181 sexed and counted. Six females and four males from the two parental strains (including the  
182 individuals used for the initial crosses), five F1 heterozygous females and the nine parthenogenetic  
183 females obtained through this experiment were kept for DNA extraction and genotyping, in order to  
184 analyse the recombination patterns resulting from parthenogenesis.

185 DNA was extracted from the 24 individuals using the NucleoSpin® Tissue from Macherey Nagel,  
186 following the manufacturer's instructions.

187 To analyse the recombination patterns of the nine parthenogenetic females, we genotyped 63 SNP  
188 (Single Nucleotide Polymorphism) markers, having different alleles between the Makindu and  
189 Kobodo strains, and being distributed along the 10 chromosomes of the genetic map of *Cotesia*  
190 *typhae*, (Benoist et al., 2020a). Four chromosomes contained more markers than the others to  
191 investigate the recombination patterns along chromosomes. For these four chromosomes, the  
192 markers were chosen to have about 10cM between two successive markers when possible. The  
193 genetic position of all the markers used in this present study are given in Supplementary Table 1.

194 The HRM (High Resolution Melt) technique was used to genotype 61 of the markers. This technique  
195 is based on the analysis of melt curves of DNA fragments after amplification by PCR. The melt curves  
196 are different according to the nucleotide composition of the DNA fragments, and therefore allow to  
197 discriminate between homozygotes and heterozygotes at a given SNP. For each SNP marker, a 10µL  
198 mix was made with about 1ng of DNA, 0.2µM of each primer, and 5µL of Precision Melt Supermix  
199 (Bio-Rad), completed with water. The PCR protocol was 95°C for 2 minutes, followed by 40 cycles of  
200 95°C for 10 seconds, 60°C for 30 seconds, 72°C for 30 seconds, followed by a complete denaturation  
201 of 30 seconds at 95°C before performing the melt curve. The melt curve was performed on a CFX96™  
202 Real-Time System (Bio-Rad), and was started by an initial step of 1 minute at 60°C, followed by 10  
203 seconds of every 0.2°C increment between 65°C and 95°C. The raw data resulting from the melt  
204 curves were analysed with the uAnalyze v2.1 software (Dwight et al., 2012) in order to infer the  
205 females' genotypes at each SNP marker.

206 The two remaining SNP markers (8225nov and 21770nov) were genotyped using allele specific PCR.  
207 For this method, two parallel amplifications were performed on individuals, one of the primers of the  
208 couple being a common primer, and the other one being a specific primer, either to the Makindu, or  
209 Kobodo allele. About 1ng of DNA was mixed with 1X buffer, 3mM MgCl<sub>2</sub>, 0.4mM dNTP, 0.4µM of  
210 each primer, 1U GoTaq® Flexi DNA Polymerase (Promega), and completed with water. The PCR  
211 programme was 5 minutes at 95°C, followed by 40 cycles of 95°C for 1 minute, 50°C or 55°C for 1  
212 minute (50°C for 8225nov and 55°C for 21770nov), 72°C for one minute and a final elongation of 5  
213 minutes at 72°C. The PCR products were then run on a 2% agarose gel to check which PCR were  
214 positive and therefore infer the genotypes.

215 All the primers used were designed for this study and their sequences are given in Supplementary  
216 Table 2.

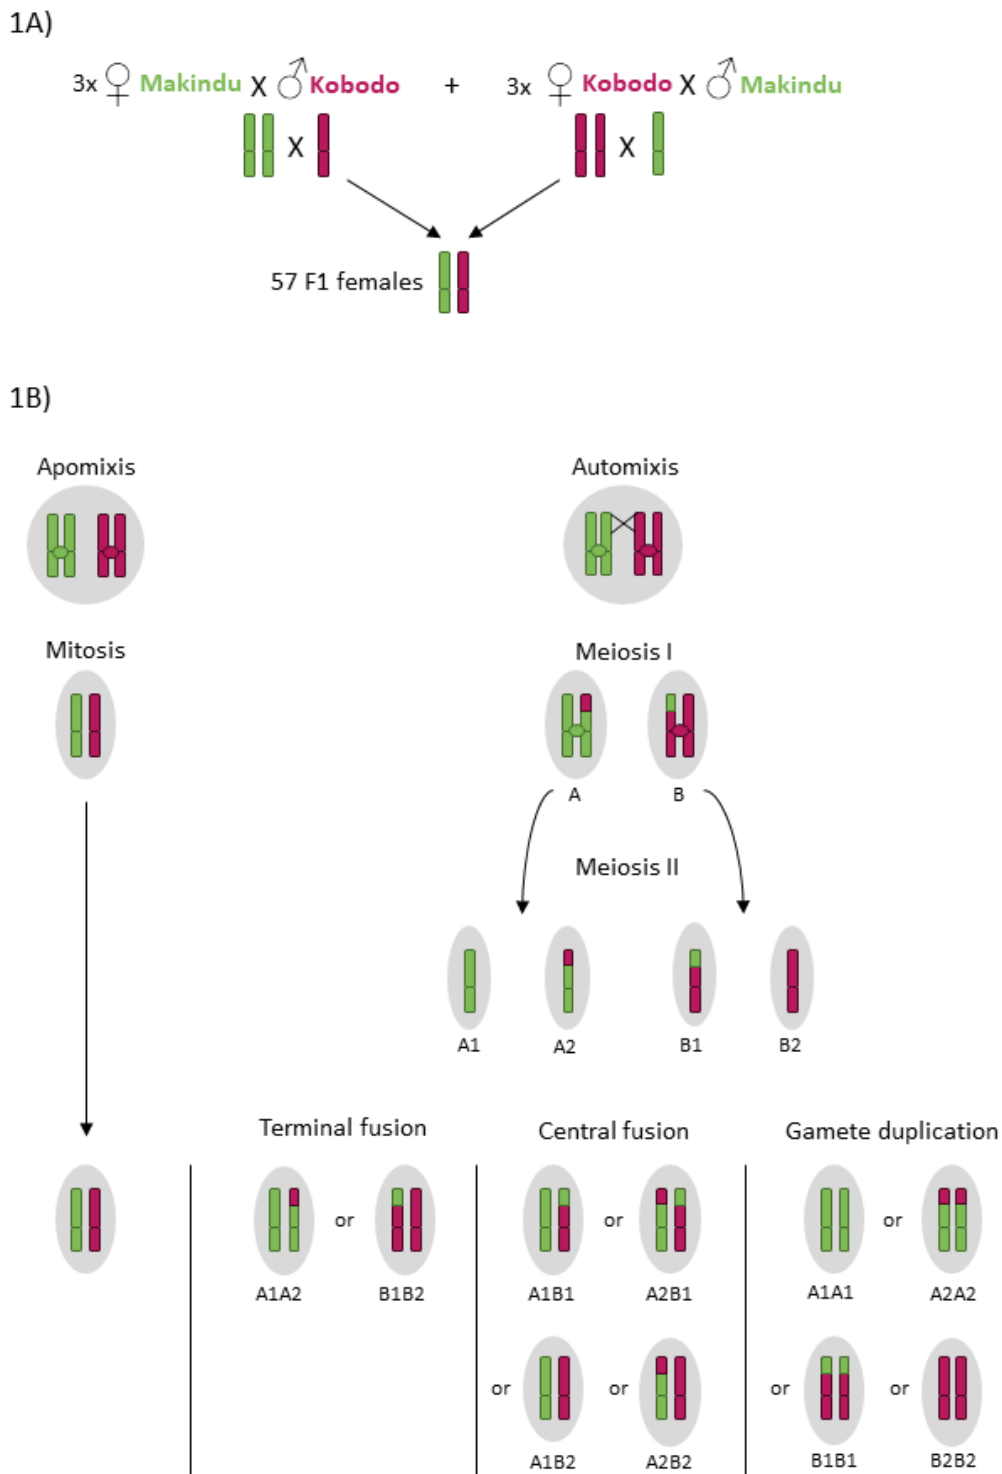

217

218 Figure 1: A) Crosses performed in this study in order to obtain virgin heterozygous females. B)  
 219 Expected genotypes' patterns of parthenogenetic daughters according to the thelytoky mechanism

220 involved. The patterns can vary from complete loss of heterozygosity (under gamete duplication) to  
221 complete maintenance of heterozygosity (under apomixis).

222

### 223 **Looking for thelytoky in mated females**

224 To see if mated females produce parthenogenetic daughters as well as sexual daughters, 40 crosses  
225 between Makindu virgin females and Kobodo males were performed, according to the protocol  
226 described in the previous section. By genotyping the daughters of these crosses with a SNP marker  
227 differing between the Makindu and Kobodo strains, we can deduce if they were produced sexually (if  
228 heterozygous at the marker) or through parthenogenesis (if homozygous for the Makindu allele at  
229 the marker).

230 Out of the 40 crosses, only the ones leading to a mix of male and female offspring were kept in our  
231 analysis, leading to a total of 1861 daughters and 1803 sons. To genotype the 1861 daughters, a  
232 direct PCR method was used, instead of a classic DNA extraction. For each female, the abdomen was  
233 removed (because the presence of gametes could hinder the genotyping) and the rest of the body  
234 was placed in 20 $\mu$ L of Dilution Buffer and 0.5 $\mu$ L of DNA Release Additive (Thermoscientific). The  
235 tubes were kept at room temperature for 5 minutes then placed at 98°C for 2 minutes. One  
236 microliter of this mix was used as template for the PCR performed for the HRM genotyping (see  
237 above) of one SNP marker, 27068nov. All the females that had a clear Makindu homozygote  
238 genotype and all the females presenting an uncertain genotype were withdrawn from their buffer  
239 and their DNA was properly extracted with the NucleoSpin® Tissue kit from Macherey Nagel. They  
240 were then genotyped at 2 more markers (8225nov and 21770nov) to confirm their status, by an  
241 allele-specific PCR method. The three markers used here for genotyping were used previously for the  
242 identification of the thelytoky mechanism, and the protocol is the same as described above.

243

### 244 **Search for a bacterial cause of thelytoky in *Cotesia typhae***

245 To find out if the cause of thelytoky in *C. typhae* could be bacterial, we first performed PCR with  
246 primers designed to amplify several micro-organisms known to manipulate sex in insects. Ten virgin  
247 Makindu females that produced parthenogenetic daughters and two virgin Makindu females that  
248 didn't produce daughters were tested with 8 primers sets, taken from (Foray et al., 2013), except for  
249 one primer set, specific to *Wolbachia*, taken from (Casiraghi et al., 2005). The primers' sequences, Tm  
250 used for PCR, and their original publication are given in Supplementary Table 3. About 1ng of DNA  
251 was mixed with 1X buffer, 3mM MgCl<sub>2</sub>, 0.4mM dNTP, 0.4 $\mu$ M of each primer, 1U GoTaq® Flexi DNA  
252 Polymerase (Promega), and completed with water. The PCR programme was 5 minutes at 95°C,  
253 followed by 40 cycles of 95°C for 1 minute, Tm for 1 minute, 72°C for one minute and a final  
254 elongation of 5 minutes at 72°C. The PCR products were then run on a 1% agarose gel to check for  
255 positive amplification.

256 The amplified fragments obtained with the *Arsenophonus* primer set were sequenced with the  
257 BigDye™ Terminator v1.1 Cycle Sequencing Kit (ThermoFisher Scientific), following the  
258 manufacturer's protocol. After the identification of the bacteria *Pantoea dispersa* through  
259 sequencing, 8 virgin Kobodo females that didn't produce any parthenogenetic daughters were also  
260 tested with this primer set. Since our Kobodo laboratory strain doesn't undergo thelytoky, this test  
261 was performed to check if *Pantoea dispersa* could be the causative agent of thelytoky in *C. typhae*.

262 To complete this experiment, we performed an antibiotic treatment on the Makindu laboratory  
 263 strain to remove any potential sex manipulating bacteria in *C. typhae* females. Rifampicin was added  
 264 in the host caterpillars' artificial diet, at a final concentration of 2g/L, for 4 *C. typhae* generations. This  
 265 treatment has previously been shown to eliminate *Wolbachia* bacteria in a close species, *Cotesia*  
 266 *sesamiae* (Mochiah et al., 2002). The phenotyping results after this first treatment being ambiguous,  
 267 it was continued for 7 more generations, with tetracyclin added for the 4 last generations, also at a  
 268 final concentration of 2g/L. At that point, 79 virgin *C. typhae* females were phenotyped, according to  
 269 the phenotyping protocol previously described.

270

## 271 Results

### 272 Phenotypes of the different strains/populations

273 We phenotyped two laboratory strains for the thelytokous character, Makindu and Kobodo, and a  
 274 wild population, coming from the Kobodo locality. The numbers of available virgin females obtained  
 275 for phenotyping were the following: 99 from 13 different cocoon masses for the Makindu strain, 40  
 276 from 7 cocoon masses for the Kobodo strain, and 29 from 6 cocoon masses for the Kobodo wild  
 277 population. The results (Table 1) are very contrasted between these three populations, since the  
 278 number of parthenogenetic females is null in the Kobodo isofemale strain, intermediate in the  
 279 Kobodo wild population (28% of virgin females produced daughters), and high in the Makindu  
 280 isofemale strain (68% of virgin females produced daughters). The thelytokous phenotype is therefore  
 281 present in the wild and is not a laboratory artefact, but was apparently lost in the Kobodo laboratory  
 282 strain, or present at a frequency too low to be detected. Unfortunately, the wild Makindu population  
 283 does not exist anymore and could not be tested in this study.

284

|                                           |                      | N  | Number of offspring with parthenogenetic females | Total number of males in the N offspring | Total number of parthenogenetic females in the N offspring | Mean number [min ; max] of parthenogenetic females per offspring |
|-------------------------------------------|----------------------|----|--------------------------------------------------|------------------------------------------|------------------------------------------------------------|------------------------------------------------------------------|
| Makindu isofemale strain                  |                      | 99 | 67 (68%)                                         | 10657                                    | 225 (2%)                                                   | 2.3 [0;8]                                                        |
| Kobodo isofemale strain                   |                      | 40 | 0                                                | 5405                                     | 0                                                          | 0                                                                |
| Kobodo wild population                    |                      | 29 | 8 (28%)                                          | 2132                                     | 8 (0.4%)                                                   | 0.3 [0;1]                                                        |
| Makindu strain after antibiotic treatment | After 4 generations  | 55 | 15 (27%)                                         | 5886                                     | 17 (0.3%)                                                  | 0.3 [0;2]                                                        |
|                                           | After 11 generations | 79 | 13 (16%)                                         | 8272                                     | 16 (0.2%)                                                  | 0.2 [0;4]                                                        |

285 Table 1: Results of the thelytoky phenotyping of the different strains/populations. The phenotyping is  
 286 based on the number and frequency of daughters produced parthenogenetically (parthenogenetic  
 287 females) in the offspring of virgin *C. typhae* females. "N" is the number of virgin females tested.



288 **Ploidy of the daughters of virgin females**

289 One daughter from the progeny of a fertilized female and 2 males, all belonging to the Makindu  
 290 laboratory strain, were processed by flow cytometry as respective controls for diploid and haploid  
 291 *Cotesia typhae* genomes. Five parthenogenetic daughters of virgin females were then processed,  
 292 resulting in an estimated genome size identical to the control female and twice that of the control  
 293 males (Table 2). We can therefore conclude that *C. typhae* parthenogenetic females are diploid and  
 294 not the result of feminization of haploid eggs.

| Sample                   | Size (pg) | Size (Mpb) | Ploidy  |
|--------------------------|-----------|------------|---------|
| Control female           | 0.47      | 458.27     | Diploid |
| Control male 1           | 0.26      | 251.84     | Haploid |
| Control male 2           | 0.25      | 241.12     | Haploid |
| Parthenogenetic female 1 | 0.48      | 467.51     | Diploid |
| Parthenogenetic female 2 | 0.48      | 473.24     | Diploid |
| Parthenogenetic female 3 | 0.49      | 475.28     | Diploid |
| Parthenogenetic female 4 | 0.49      | 475.91     | Diploid |
| Parthenogenetic female 5 | 0.5       | 484.26     | Diploid |

295 Table 2: Genome size estimated by flow cytometry. Parthenogenetic females have the same genome  
 296 size as the control female, corresponding to about twice the males' haploid genome size.

297

298 **Fecundity of parthenogenetic females**

299 Eleven parthenogenetic females (issue from virgin Makindu mothers) were randomly allowed to  
 300 mate with their brothers and were used to parasitize eleven caterpillars. Out of these eleven  
 301 females, 4 had male only offspring and 7 had a mixed offspring. The number of offspring per female  
 302 and the sex-ratio are indicated in Table 3. No significant difference of the offspring size and sex ratio  
 303 was observed between the control and parthenogenetic female datasets (p-value obtained following  
 304 Mann-Whitney rank test was 0.559 for offspring number and 0.07 for sex-ratio). The fecundity of  
 305 parthenogenetic females is therefore equivalent to that of the control females.

|                                     | N  | Mean number of offspring per mated female $\pm$ Standard Error | Mean female sex-ratio (when mated) $\pm$ Standard Error |
|-------------------------------------|----|----------------------------------------------------------------|---------------------------------------------------------|
| Control Makindu strain <sup>a</sup> | 41 | 59 $\pm$ 4.2                                                   | 0.78 $\pm$ 0.03                                         |
| Parthenogenetic females             | 7  | 54.3 $\pm$ 9.2                                                 | 0.65 $\pm$ 0.12                                         |

306 Table 3: Comparison of the fecundity between Makindu parthenogenetic females and control  
 307 females of the same laboratory strain. a: data from (Benoist et al., 2017).

308 **Thelytoky mechanism occurring in *Cotesia typhae***

309 The genotyping of the 63 SNP markers first confirmed that fathers and mothers of the initial crosses  
310 between the Makindu and Kobodo laboratory strains were homozygotes for their strain's alleles. The  
311 57 virgin F1 daughters resulting from these crosses were thus heterozygous at the SNP markers,  
312 which was confirmed for the 5 F1 daughters that were genotyped. Each of these females successfully  
313 parasitized a host larva, and from the 57 resulting offspring, six contained parthenogenetic females  
314 (originating from 4 of the initial 6 crosses, 2 in each cross direction), corresponding to a total of 9 F2  
315 parthenogenetic females for 6653 males. These 9 females were genotyped for the 63 SNP. The  
316 genotypes and the deduced recombination events are presented in Supplementary Table 1. The  
317 recombination patterns of the 4 chromosomes genotyped with a higher density of markers are  
318 shown in Figure 2.

319 For six of the females, a mixture of heterozygous and homozygous markers was observed, with a  
320 surplus of heterozygotes (280 heterozygous genotypes for 94 homozygous genotypes). The number  
321 and pattern of heterozygous markers for these females indicates a mechanism of automixis with  
322 central fusion. Indeed, the central parts of the chromosomes maintain a heterozygous state while  
323 there is a recombination gradient leading to more homozygous genotypes towards the extremities of  
324 the chromosomes (Fig. 2). On average, nine recombination events per genome were detected for  
325 these six females with a minimum value of five events and a maximum of 16 events detected. Based  
326 on the density of the markers characterized, these results are consistent with the genetic length  
327 measured by Benoist et al. (2020a).

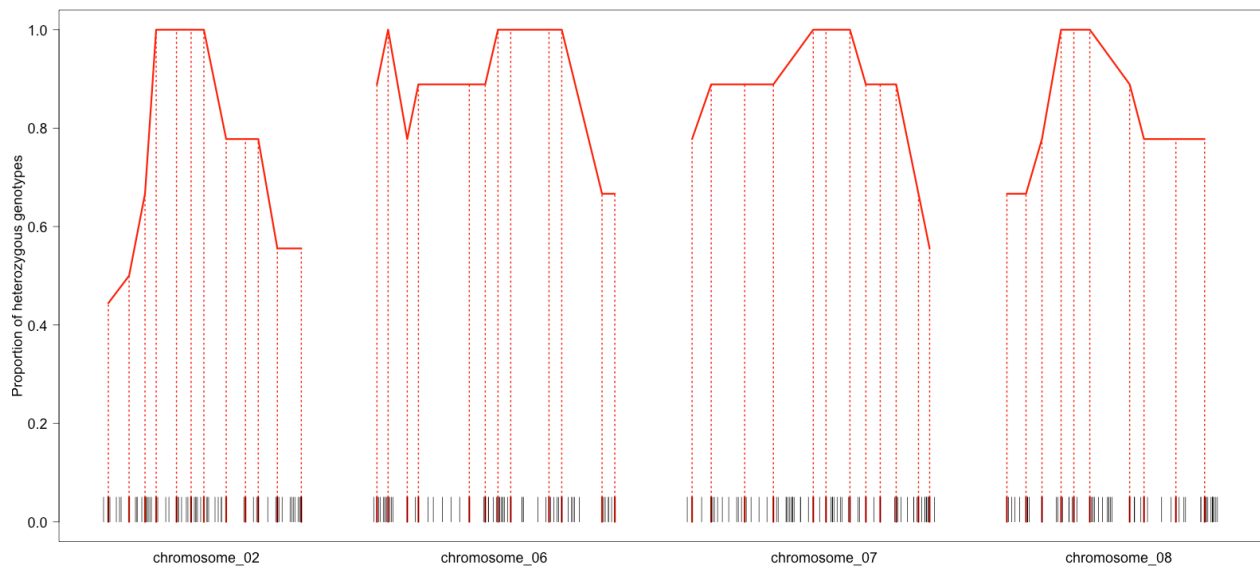

328

329 Figure 2: Proportion of heterozygous females (out of nine) for each genotyped SNP marker. The  
330 results are only shown for the 4 chromosomes for which a higher number of markers were  
331 genotyped. The black segments on the x axis are indicative of the genetic position of all the markers  
332 of the genetic map (Benoist et al., 2020a) and the red segments with the dotted lines correspond to  
333 the positions of the markers genotyped in this study. The occurrence of homozygous and  
334 heterozygous states along the chromosomes is congruent with a mechanism of automixis. The  
335 observation of 100% heterozygosity in the central part of the chromosomes suggests that diploidy is  
336 restored through central fusion and is indicative of the position of each chromosome's centromere.

337 For the other 3 parthenogenetic females, all the 63 markers were heterozygous, revealing no  
338 detection of recombination event on the 10 chromosomes. We estimated the probability of such an  
339 observation under the hypothesis that a unique mechanism of central fusion occurs. For each  
340 chromosome, we calculated a mean number of recombinations based on the nine parthenogenetic  
341 females. Assuming that the number of recombinations on a chromosome follows a Poisson  
342 distribution, we can estimate the probability of zero recombination for each chromosome based on  
343 the mean number estimate. It varies according to the genetic length of the chromosome and to the  
344 density of markers genotyped: it was estimated between 0.29 for chromosome 2 and 0.8 for  
345 chromosome 9. Multiplying the probability over the ten chromosomes, we calculated a probability of  
346 0.0025 to observe an entirely heterozygous parthenogenetic daughter. Using this individual  
347 probability, we estimated that the probability to detect three out of nine parthenogenetic daughters  
348 showing no recombination events on the 10 chromosomes was  $1.6 \times 10^{-6}$ . This hypothesis is very  
349 unlikely, therefore we suspect another mechanism could also be at play in causing thelytoky in  
350 *Cotesia typhae*. It is interesting to note that we observed both patterns (partial homozygosity and  
351 complete heterozygosity) in the offspring resulting from initial crosses of both directions. Moreover,  
352 one of the F1 heterozygous females displayed both patterns in her progeny.

353

#### 354 **Presence of parthenogenetic females among the daughters of mated females**

355 Among the 40 crosses between Makindu females and Kobodo males, 35 had mixed offspring  
356 comprising both males and females, and were kept in our analysis, leading to a total of 1861 females  
357 and 1803 males. All 1861 females were genotyped for one SNP marker. Females resulting from  
358 fecundation should be heterozygous while parthenogenetic females should be homozygous for the  
359 Makindu allele. In total, we found 14 homozygous females, which were confirmed by the genotyping  
360 of 2 other markers. These 14 females correspond to 0.77% of the parthenogenetic offspring (males  
361 resulting from arrhenotoky representing 99.33%) and originate from 10 different mothers (29% of  
362 the 35 mothers) (Table 4). Even though the percentage of parthenogenetic females found is much  
363 smaller than in the offspring of virgin females, this finding shows that the female progeny of mated  
364 females can come from a mixture of parthenogenesis and sexual reproduction.

|                        | N  | Number of parthenogenetic offspring (males plus parthenogenetic females) | Number of parthenogenetic females among the parthenogenetic offspring | Mean number [min ; max] of parthenogenetic females in offspring when present |
|------------------------|----|--------------------------------------------------------------------------|-----------------------------------------------------------------------|------------------------------------------------------------------------------|
| Makindu virgin females | 99 | 10882                                                                    | 225 (2%)                                                              | 2.3 [1;8]                                                                    |
| Makindu mated females  | 35 | 1817                                                                     | 14 (0.77%)                                                            | 1.4 [1;3]                                                                    |

365 Table 4: Comparison of the frequency of the thelytokous character between virgin and mated  
366 Makindu females. In each case, the number of parthenogenetic daughters is presented as a  
367 percentage of the total number of parthenogenetic offspring, mainly composed of males obtained  
368 from arrhenotoky. "N" is the number of offspring analysed.

369

## 370 **Origin of thelytoky in *Cotesia typhae***

371 In order to find out if thelytoky in *Cotesia typhae* has a bacterial origin, we extracted DNA from  
372 Makindu virgin mothers that produced daughters and used primers to try to amplify the DNA of six  
373 different micro-organisms known for sex manipulation in insects: *Wolbachia*, *Rickettsia*, *Cardinium*,  
374 *Arsenophonus*, *Spiroplasma* and *Microsporidia* (Foray et al., 2013). Only one primer set led to a solid  
375 amplification, the one designed to amplify *Arsenophonus* 23S. After sequencing the amplified  
376 fragment, the bacterium was identified not as *Arsenophonus* but as *Pantoea dispersa*, for which no  
377 mention in relation to thelytoky was found in literature. We then tried to amplify this same  
378 bacterium from the DNA of Kobodo virgin mothers, who don't produce any daughters: *Pantoea*  
379 *dispersa* was present in all the samples as well. This makes it unlikely for this bacterium to be  
380 responsible for thelytoky in *C. typhae*.

381 After rearing parasitized caterpillars for four generations on a rifampicin diet, we phenotyped the  
382 Makindu strain again. 55 virgin females, coming from 5 different cocoon masses, were allowed to  
383 parasitize *Sesamia nonagrioides* caterpillars. Fifteen of these virgin females produced daughters,  
384 leading to a total of 17 daughters for 5886 sons (Table 1). Another phenotyping was performed on 79  
385 females from 10 different cocoon masses, after 11 generations of a rifampicin diet (with tetracyclin  
386 added for the last 4 generations). Thirteen of these virgin females produced daughters, leading to a  
387 total of 16 daughters for 8272 sons (Table 1). The percentage of thelytokous females is thus smaller  
388 than the one observed before antibiotic treatment but not null.

389

## 390 **Discussion**

391 The phenotypic survey presented here confirms the biological reality of low frequency asexual  
392 production of females in the haplo-diploid Hymenoptera *Cotesia typhae*. The process has been  
393 observed in a significant number of progenies from both an inbred laboratory strain and a natural  
394 population. It has been shown to occur in the progeny of virgin as well as fertilized females, despite  
395 concerning only a small fraction of the individuals from a cocoon mass.

396 This configuration of low frequency thelytoky is unusual. As a matter of fact, the expression thelytoky  
397 is even defined by some authors as a "parthenogenetic mode where females produce only females  
398 from unfertilized eggs" (Vershina and Kuznetsova, 2016). Among illustrated examples of  
399 parthenogenesis *sensu stricto*, even when facultative, asexual production of females involves the  
400 whole progeny. The case described here is somewhat closer to what is called tycho-parthenogenesis,  
401 based on the frequency of birth of parthenogenetic female eggs (Whiting, 1945).  
402 Tycho-parthenogenesis is defined as "kind of occasional thelytoky characterized by the spontaneous  
403 hatching of a small proportion of eggs laid by virgin females" (Pardo et al., 1995). It has been mainly  
404 described in diplodiploid species where embryonic development is induced by sperm fertilization. In  
405 such species, developmental constraints and inbreeding depression prevent successful hatching of  
406 unfertilized eggs in most of the cases (Little et al., 2017). In haplodiploid species, unfertilized eggs  
407 hatch with a high frequency because they naturally produce males in species reproducing sexually. It  
408 is thus difficult to classify *C. typhae* as a tycho-parthenogenetic species.

409 A better description of its asexual reproductive mode would require the comparative study of the  
410 hatching success of fertilized diploid eggs, unfertilized diploid eggs and unfertilized haploid eggs. As  
411 *C. typhae* is an endoparasitoid species, such estimates are difficult to obtain. The low proportion of  
412 asexual daughters seems not however to be detrimental to the wasp as progeny numbers were  
413 similar between those without, and those including thelytokous daughters. Benoist et al. (2020b)

414 showed that the number of oviposited eggs was close to the number of emerging adults. The survival  
415 ratio deduced from these two estimates is similar between the two laboratory strains Kobodo and  
416 Makindu, however thelytoky was demonstrated only in the Makindu strain. Taken together, these  
417 data suggest that the phenomenon most likely results from rare events rather than from low  
418 developmental success. Furthermore, the daughters produced parthenogenetically turned out to be  
419 viable and fertile, indicating that low frequency thelytoky may be either neutral or beneficial but not  
420 disadvantageous.

421 The question remains as to whether the phenomenon is accidental or an ongoing evolutionary  
422 process due to its adaptive benefit (van der Kooi and Schwander, 2015). Studying the occurrence of  
423 parthenogenesis among Ephemeroptera, Liegeois et al. (2021) suggested that asexual reproduction  
424 was selectively advantageous in many species from this insect order despite its associated low  
425 hatching success. The benefit derives from the short adult life and the low dispersal ability that  
426 reduce the probability of encountering a reproductive partner. The fitness of sexually reproducing  
427 individuals may consequently be reduced under certain circumstances. As in mayflies, *C. typhae* has  
428 an adult life limited to a few days (between two and three days in laboratory conditions, Kaiser et al.,  
429 2017). However, it is gregarious and mating between sisters and brothers emerging from the same  
430 cocoon mass is observed in rearing conditions. Female access to male fertilization should thus be  
431 facilitated. Whether sib-mating occurs in natural conditions is actually unknown but it may be  
432 favoured by the endophytic mode of life of its larval host, because cocoon masses are formed inside  
433 plant stems. The dispersal behaviour of males and females is also unknown but is likely to be limited  
434 to short distances, as it was estimated to be at most 64m for the close relative *Cotesia flavipes*  
435 (Dinardo-Miranda et al., 2014; Sallam et al., 2001). Sib-mating has been shown to be avoided in  
436 several studies. In *Cotesia glomerata*, it was demonstrated that females mated with males from the  
437 same cocoon mass in only 27.5% of the cases (Gu and Dorn, 2003). In *Venturia canescens*, studies of  
438 mating behaviour showed that sib-mating was limited by a male-biased dispersal (Collet et al., 2020).  
439 If *C. typhae* males behave similarly in nature, females may face limited access to copulation. Another  
440 potential restricted access to fertilization concerns sperm limitation. A mated female may meet some  
441 difficulties due to sperm incompatibility or a delay post-mating where sperm is not available. When  
442 the sex ratio is highly biased, males have to mate with numerous females and may undergo  
443 temporarily or definitively sperm depletion (Boivin, 2013). Preliminary experiments revealed that *C.*  
444 *typhae* males were able to fertilize ten females successively with no detectable impact on the  
445 progeny's sex-ratio (data not shown). However, some of the mated females (whatever their mating  
446 rank was in the protocol) produced male-only offspring, suggesting that sperm transfer and/or usage  
447 is sometimes difficult. Whether it results from restricted access to males or to sperm itself, sperm  
448 limitation may favour expansion of asexual reproduction. Further experiments are needed to  
449 estimate mating and fertilization success of *Cotesia typhae* in natural conditions.

450 Beyond reproductive strategy itself, parthenogenesis has been shown to be associated with  
451 ecological characteristics that may favour or prevent its evolution. Two opposite ecological trends  
452 have been described co-occurring with asexual reproduction expansion: the "general purpose  
453 genotype" (GPG) where asexual lineages are observed on broader ecological niches than their sexual  
454 counterparts and the "frozen niche variation" (FNV) where parthenogenetic species or populations  
455 have far more restricted niches than sexual ones (Tvedte et al., 2019). Exploring a wide dataset of  
456 haplodiploid arthropods reproducing exclusively parthenogenetically (obligate parthenogenesis), van  
457 der Kooi et al. (2017) concluded that GPG was the most common situation. They showed that most  
458 parthenogenetic species have broader ecological and geographical range than close relative sexual  
459 species but also that transition toward parthenogenesis was more likely for species exhibiting a wide  
460 distribution. Nevertheless, numerous cases of ecological specialization of asexual lineages have been

461 described, such as *Venturia canescens*. In this polymorphic species, two kinds of populations live in  
462 sympatry: parthenogenetic populations found in stable anthropic habitats (bakeries and granaries)  
463 and sexual ones associated with natural and more instable resources (Schneider et al., 2002).  
464 Interestingly, before being characterized as a new species, *Cotesia typhae* was first identified as a  
465 specialized clade (only one host insect, *Sesamia nonagrioides*, mainly found on one host plant, *Typha*  
466 *domingiensis*) of the parasitoid species *Cotesia sesamiae*. According to Branca et al. (2019), some  
467 populations of *C. sesamiae* are less specialized than others. Studying the existence of thelytokous  
468 reproduction in those populations would be informative about the possible link between emerging  
469 parthenogenesis and specialization.

470 Regarding the mechanism involved in thelytokous reproduction, we faced an unexpected result as  
471 data strongly suggest that two different processes may co-occur: automixis with central fusion and  
472 apomixis. More surprisingly, the two supposed mechanisms were observed to co-occur in the  
473 progeny of a single female (K4M1) and independently of the cross direction to obtain F1 virgin  
474 mothers (Kobodo female x Makindu male or Makindu female x Kobodo male). Unfortunately, this  
475 result is supported by small sample size due to the scarcity of the phenomenon. We may wonder  
476 whether a unique mechanism, distinct from those already described, could explain such a result. Ma  
477 and Schwander (2017) describe for example an unusual process where meiosis is inverted (sister  
478 chromatids separate before homologs) followed by terminal fusion. However, the resulting progeny  
479 of such a process is 100% heterozygous, a result that does not differ from apomixis. Another  
480 mechanism presented in the same review implies an endoreplication preceding meiosis. Assuming  
481 such a process occurs in *C. typhae*, and hypothesizing that recombination, and consequently  
482 segregation during the first division, may arise either between identical or between homologous  
483 chromosomes, some intermediate situations are expected. Once again, it does not reconcile the  
484 clear-cut figure we observe with individuals entirely heterozygous suggesting zero recombination  
485 between homologs and individuals for which recombination is observed for almost all homologs. To  
486 better understand the mechanism underlying thelytoky in *C. typhae*, a cytological approach of  
487 meiosis and parthenogenesis would be necessary.

488 Despite the lack of a unified mechanism to explain the genotypic profile observed in the F2 progenies  
489 obtained, we can confirm that recombination occurred, at least in cases attributable to central  
490 fusion, and that these recombination events were as frequent as those observed in sexual  
491 reproduction (Benoist et al., 2020a). By contrast, severe reductions of recombination rates were  
492 observed associated with parthenogenetic reproduction in the literature. For example,  
493 recombination is reduced by up to 10-fold in the Cap bee, *Apis mellifera capensis*, a social parasite of  
494 honeybee which reproduces parthenogenetically *via* automixis with central fusion (Baudry et al.,  
495 2004). In the little fire ant *Wasmannia auropunctata*, sexual populations coexist with asexual  
496 populations in which reproductive queens are produced by automictic parthenogenesis with central  
497 fusion. In the asexual populations, recombination rate is reduced by a factor 45 compared to the  
498 sexual populations (Rey et al., 2011). The reduction of recombination rate is assumed to mitigate the  
499 potential deleterious impact of thelytoky: under automixis with central fusion, heterozygosity is  
500 preserved unless recombination occurs (Figure 1). In species affected by inbreeding depression, a  
501 homozygosity increase would be detrimental and could be advantageously limited by a low  
502 recombination rate. As the molecular mechanism involved in restoration of diploidy and  
503 recombination are probably distinct, the situation observed in Cap bee and little fire ant may result  
504 from a long-term evolutionary process. If the phenomenon described in *C. typhae* is recent, it may  
505 explain the unchanged recombination rate.

506 Otherwise, the inbreeding impact could be meaningless in *C. typhae*. Hymenoptera are haplodiploid  
507 and could thus be less sensitive to inbreeding because most of the deleterious alleles are purged at  
508 the haploid state in males. However, their sex determination system may be highly compelling  
509 regarding homozygosity and ability to reproduce *via* thelytoky (Vorburger, 2014). The most common,  
510 and likely ancestral, sex determination system is governed by the genotype at one (sl-CSD: single  
511 locus Complementary Sex Determination) or few loci (ml-CSD: multi locus CSD) (Heimpel and de  
512 Boer, 2008). Under such a determinism, individuals that are heterozygous at least at one of these  
513 CSD loci develop as diploid females while hemizygous or homozygous individuals at all CSD loci  
514 develop as haploid or diploid males respectively. In most hymenopteran species, diploid males have a  
515 low survival rate and/or are often sterile. Enhanced homozygosity due to thelytoky may be very  
516 costly when it results in diploid male production (de Boer et al., 2015, 2012; van Wilgenburg et al.,  
517 2006; Zhou et al., 2007). Other sex determination systems have been described in Hymenoptera that  
518 are less sensitive to homozygosity. In Paternal Genome Elimination, haploid males initially develop  
519 from a fertilized egg from which the paternal genome is expelled secondarily (Heimpel and de Boer,  
520 2008). This mechanism can be discarded for *Cotesia typhae* as virgin females are able to produce  
521 haploid sons. Genome imprinting has been studied in *Nasonia vitripennis* and relies on epigenetic  
522 landmarks deposited by the mother in the oocyte that will be modified by paternal genome  
523 expression to allow female development (van de Zande and Verhulst, 2014).

524 Within the *Cotesia* genus, sex determination has been investigated in a few species. The CSD system  
525 has been demonstrated in three species: *C. glomerata* where sex is determined by a single locus  
526 (Zhou et al., 2006), *C. vestalis* and *C. rubecula* where sex determination is encoded by at least two  
527 different loci (de Boer et al., 2012, 2008). The sl-CSD system was discarded for *C. flavipes* and *C.*  
528 *sesamiae* (Niyibigira et al., 2004), the closest relative to *C. typhae*. The two strains of *C. typhae*  
529 studied here have been reared for more than 80 generations in laboratory conditions starting from  
530 an isofemale line, using full-sisters mated with their brothers to generate each generation. Each new  
531 generation has subsequently been produced from at most 20 different females, leading to highly  
532 inbred strains. Despite this, the sex-ratio in the rearing strains remains female biased, indicating that  
533 either several CSD loci or another mechanism, such as genome imprinting, are involved in sex  
534 determination. Whatever the process responsible for sexual identity, it is less sensitive to  
535 homozygosity increase than sl-CSD and should induce a lower selective pressure on recombination  
536 rate than observed in *Apis mellifera capensis* or the ant *Wasmannia auropunctata*.

537 The bacterial origin of thelytoky in *C. typhae* could not be either confirmed or completely discarded  
538 in the present study as an intermediate state (in terms of frequency of parthenogenesis) was  
539 observed following antibiotic treatment. The knowledge of the genetic mechanism could give some  
540 clues about the origin of parthenogenesis as endosymbionts have been mainly shown to favour  
541 gamete duplication. However, detailing specific interactions reveals a more complex picture.  
542 *Cardinium* is able to feminize diploid males (Giorgini et al., 2009) but also to induce automixis with  
543 central fusion (Zchori-Fein and Perlman, 2004). *Wolbachia* is mainly known to induce gamete  
544 duplication (Leach et al., 2009; Ma and Schwander, 2017) but it has also been described to promote  
545 apomixis (Weeks and Breeuwer, 2001). *Rickettsia* has also been shown to trigger functional apomixis  
546 (Adachi-Hagimori et al., 2008). Furthermore, the list of endosymbionts is probably partial and in most  
547 of the documented examples of parthenogenesis endosymbiotically determined, the cytological  
548 mechanism remains unknown. Evidence that microorganisms can promote all processes of  
549 parthenogenesis will probably arise from future research. The examples of demonstrated genetic  
550 determinism of thelytoky are rare and only concern automixis with central fusion. This is the case for  
551 the Cape honeybee (Verma and Ruttner, 1983) and for the wasp *Venturia canescens* (Beukeboom  
552 and Pijnacker, 2000). However, Tsutsui et al. (2014) described an apomixis mechanism in the

553 parasitoid wasp *Meteorus pulchricornis* for which they proposed a genetic origin of thelytoky. Even  
554 more than for endosymbiont origin, genetic determinism of parthenogenesis requires thorough  
555 investigations to determine whether it is restricted to a few cytological mechanisms. Anyway, the  
556 clearly evidenced mechanism of automixis with central fusion in *C. typhae* does not allow to settle  
557 between genetic and endosymbiont origin as this mechanism is common to both situations.

558

## 559 **Conclusion**

560 In this study, we described an unusual example of low frequency thelytokous reproduction within a  
561 sexually reproducing species. We showed that, despite its scarcity, this phenomenon is biologically  
562 significant, occurring in a laboratory strain but also in natural populations, and concerning virgin but  
563 also mated females that produced mixed progenies composed of arrhenotokous males, rare  
564 parthenogenetic females and mostly sexually determined females. Two distinct mechanisms were  
565 described to produce parthenogenetic females, apomixis and automixis with central fusion. This  
566 unfixed mechanism associated with the low frequency of the phenomenon could reflect an  
567 accidental process, but may also be consistent with an emerging and evolving property of this  
568 parasitoid species.

569 The results concerning the origin (genetic or endosymbiotic) need to be consolidated, notably  
570 through the inspection of ovaries and search for the presence of microorganisms. Those further  
571 investigations would benefit from an increased frequency of thelytoky, therefore we will try in the  
572 future to select strains showing higher frequency of asexual reproduction.

573

## 574 **Acknowledgments**

575 The present work has benefited from the I2BC Cytometry platform (Université Paris-Saclay, CEA,  
576 CNRS, Institute for Integrative Biology of the Cell (I2BC), 91198, Gif-sur-Yvette, France) with the help  
577 of Mickaël Bourge. We thank Rémi Jeannette and Sylvie Nortier for insect rearing at Gif, and Daniel  
578 Couch for proofreading.

579 This work was supported by the French National Research Agency (project Cotebio ANR-17-CE32-  
580 0015), and by the authors' operating grants from IRD, CNRS and *icipe*. R. Benoist was funded by the «  
581 Ecole doctorale 227 MNHN-UPMC Sciences de la Nature et de l'Homme: évolution et écologie ».

582 All experimentations were realized under the juridical frame of a Material Transfer Agreement signed  
583 between IRD, *icipe* and CNRS (CNRS 072057/IRD 302227/00) and the authorization to import *Cotesia*  
584 in France delivered by the DRIAAF of Ile de France (IDF 2017-OI-26-032)

585

## 586 **Data availability**

587 Raw data for Figure 2, and Tables 1, 3 and 4 are available at <https://zenodo.org/record/5785373>

588

## 589 **References**



- 590 Adachi-Hagimori, T., Miura, K., Stouthamer, R., 2008. A new cytogenetic mechanism for bacterial  
591 endosymbiont-induced parthenogenesis in Hymenoptera. *Proc. R. Soc. B.* 275, 2667–2673.  
592 <https://doi.org/10.1098/rspb.2008.0792>
- 593 Ball, S.L., 2001. Tycho parthenogenesis and mixed mating in natural populations of the mayfly  
594 *Stenonema femoratum*. *Heredity* 87, 373–380.
- 595 Baudry, E., Kryger, P., Allsopp, M., Koeniger, N., Vautrin, D., Mougél, F., Cornuet, J.M., Solignac, M.,  
596 2004. Whole-Genome Scan in Thelytokous-Laying Workers of the Cape Honeybee (*Apis mellifera*  
597 *capensis*): Central Fusion, Reduced Recombination Rates and Centromere Mapping Using Half-Tetrad  
598 Analysis. *Genetics* 252, 243–252.
- 599 Benoist, R., Capdevielle-Dulac, C., Chantre, C., Jeannette, R., Calatayud, P., Drezen, J., Dupas, S., Le  
600 Rouzic, A., Le Ru, B., Moreau, L., Van Dijk, E., Kaiser, L., Mougél, F., 2020a. Quantitative trait loci  
601 involved in the reproductive success of a parasitoid wasp. *Mol Ecol* 29, 3476–3493.  
602 <https://doi.org/10.1111/mec.15567>
- 603 Benoist, R., Chantre, C., Capdevielle-Dulac, C., Bodet, M., Mougél, F., Calatayud, P.A., Dupas, S.,  
604 Huguet, E., Jeannette, R., Obonyo, J., Odorico, C., Silvain, J.F., Le Ru, B., Kaiser, L., 2017. Relationship  
605 between oviposition, virulence gene expression and parasitism success in *Cotesia typhae* nov. sp.  
606 parasitoid strains. *Genetica* 145, 469–479. <https://doi.org/10.1007/s10709-017-9987-5>
- 607 Benoist, R., Paquet, S., Decourcelle, F., Guez, J., Jeannette, R., Calatayud, P.-A., Le Ru, B., Mougél, F.,  
608 Kaiser, L., 2020b. Role of egg-laying behavior, virulence and local adaptation in a parasitoid's chances  
609 of reproducing in a new host. *Journal of Insect Physiology* 120, 103987.  
610 <https://doi.org/10.1016/j.jinsphys.2019.103987>
- 611 Beukeboom, L.W., Pijnacker, L.P., 2000. Automictic parthenogenesis in the parasitoid *Venturia*  
612 *canescens* (Hymenoptera: Ichneumonidae) revisited 43, 6.
- 613 Boivin, G., 2013. Sperm as a limiting factor in mating success in Hymenoptera parasitoids. *Entomol*  
614 *Exp Appl* 146, 149–155. <https://doi.org/10.1111/j.1570-7458.2012.01291.x>
- 615 Bourge, M., Brown, S.C., Siljak-Yakovlev, S., 2018. Flow cytometry as tool in plant sciences, with  
616 emphasis on genome size and ploidy level assessment. *Genetics & Applications* 2, 1–12.
- 617 Branca, A., Le Ru, B., Calatayud, P.-A., Obonyo, J., Musyoka, B., Capdevielle-Dulac, C., Kaiser-Arnauld,  
618 L., Silvain, J.-F., Gauthier, J., Paillusson, C., Gayral, P., Herniou, E.A., Dupas, S., 2019. Relative  
619 Influence of Host, Wolbachia, Geography and Climate on the Genetic Structure of the Sub-saharan  
620 Parasitic Wasp *Cotesia sesamiae*. *Front. Ecol. Evol.* 7, 309. <https://doi.org/10.3389/fevo.2019.00309>
- 621 Casiraghi, M., Bordenstein, S.R., Baldo, L., Lo, N., Beninati, T., Wernegreen, J.J., Werren, J.H., Bandi,  
622 C., 2005. Phylogeny of *Wolbachia pipientis* based on *gltA*, *groEL* and *ftsZ* gene sequences: clustering  
623 of arthropod and nematode symbionts in the F supergroup, and evidence for further diversity in the  
624 *Wolbachia* tree. *Microbiology* 151, 4015–4022. <https://doi.org/10.1099/mic.0.28313-0>
- 625 Chapman, N.C., Beekman, M., Allsopp, M.H., Rinderer, T.E., Lim, J., Oxley, P.R., Oldroyd, B.P., 2015.  
626 Inheritance of thelytoky in the honey bee *Apis mellifera capensis*. *Heredity* 114, 584–592.  
627 <https://doi.org/10.1038/hdy.2014.127>
- 628 Collet, M., Amat, I., Sauzet, S., Auguste, A., Fauvergue, X., Mouton, L., Desouhant, E., 2020. Insects  
629 and incest: Sib-mating tolerance in natural populations of a parasitoid wasp. *Mol Ecol* 29, 596–609.  
630 <https://doi.org/10.1111/mec.15340>

- 631 de Boer, J.G., Groenen, M.A., Pannebakker, B.A., Beukeboom, L.W., Kraus, R.H., 2015. Population-  
632 level consequences of complementary sex determination in a solitary parasitoid. *BMC Evol Biol* 15,  
633 98. <https://doi.org/10.1186/s12862-015-0340-2>
- 634 de Boer, J.G., Kuijper, B., Heimpel, G.E., Beukeboom, L.W., 2012. Sex determination meltdown upon  
635 biological control introduction of the parasitoid *Cotesia rubecula*? *Evol Appl* 5, 444–454.  
636 <https://doi.org/10.1111/j.1752-4571.2012.00270.x>
- 637 de Boer, J.G., Ode, P.J., Rendahl, A.K., Vet, L.E.M., Whitfield, J.B., Heimpel, G.E., 2008. Experimental  
638 support for multiple-locus complementary sex determination in the parasitoid *Cotesia vestalis*.  
639 *Genetics* 180, 1525–35. <https://doi.org/10.1534/genetics.107.083907>
- 640 Dinardo-Miranda, L.L., Fracasso, J.V., Costa, V.P. da, Lopes, D.O.T., 2014. Dispersal of *Cotesia flavipes*  
641 in sugarcane field and implications for parasitoid releases. *Bragantia* 73, 163–170.  
642 <https://doi.org/10.1590/brag.2014.023>
- 643 Dwight, Z.L., Palais, R., Wittwer, C.T., 2012. uAnalyze: Web-Based High-Resolution DNA Melting  
644 Analysis with Comparison to Thermodynamic Predictions. *IEEE/ACM Trans. Comput. Biol. and Bioinf.*  
645 9, 1805–1811. <https://doi.org/10.1109/TCBB.2012.112>
- 646 Foray, V., Helene, H., Martinez, S., Gibert, P., Desouhant, E., 2013. Occurrence of arrhenotoky and  
647 thelytoky in a parasitic wasp *Venturia canescens* (Hymenoptera: Ichneumonidae): Effect of  
648 endosymbionts or existence of two distinct reproductive modes? *Eur. J. Entomol.* 110, 103–107.  
649 <https://doi.org/10.14411/eje.2013.014>
- 650 Giorgini, M., Monti, M.M., Caprio, E., Stouthamer, R., Hunter, M.S., 2009. Feminization and the  
651 collapse of haplodiploidy in an asexual parasitoid wasp harboring the bacterial symbiont *Cardinium*.  
652 *Heredity* 102, 365–371. <https://doi.org/10.1038/hdy.2008.135>
- 653 Gokhman, V.E., Kuznetsova, V.G., 2018. Parthenogenesis in Hexapoda: holometabolous insects. *J*  
654 *Zool Syst Evol Res* 56, 23–34. <https://doi.org/10.1111/jzs.12183>
- 655 Gu, H., Dorn, S., 2003. Mating system and sex allocation in the gregarious parasitoid *Cotesia*  
656 *glomerata*. *Animal Behaviour* 66, 259–264. <https://doi.org/10.1006/anbe.2003.2185>
- 657 Heimpel, G.E., de Boer, J.G., 2008. Sex determination in the hymenoptera. *Annual review of*  
658 *entomology* 53, 209–30. <https://doi.org/10.1146/annurev.ento.53.103106.093441>
- 659 Jarosch, A., Stolle, E., Crewe, R.M., Moritz, R.F.A., 2011. Alternative splicing of a single transcription  
660 factor drives selfish reproductive behavior in honeybee workers (*Apis mellifera*). *Proceedings of the*  
661 *National Academy of Sciences* 108, 15282–15287. <https://doi.org/10.1073/pnas.1109343108>
- 662 Kaiser, L., Fernandez-Triana, J., Capdevielle-Dulac, C., Chantre, C., Bodet, M., Kaoula, F., Benoist, R.,  
663 Calatayud, P.-A., Dupas, S., Herniou, E.A., Jeannette, R., Obonyo, J., Silvain, J.-F., Le Ru, B., 2017.  
664 Systematics and biology of *Cotesia typhae* sp. n. (Hymenoptera, Braconidae, Microgastrinae), a  
665 potential biological control agent against the noctuid Mediterranean corn borer, *Sesamia*  
666 *nonagrioides*. *ZK* 682, 105–136. <https://doi.org/10.3897/zookeys.682.13016>
- 667 Kaiser, L., Le Ru, B.P., Kaoula, F., Paillusson, C., Capdevielle-Dulac, C., Obonyo, J.O., Herniou, E.A.,  
668 Jancek, S., Branca, A., Calatayud, P., Silvain, J., Dupas, S., 2015. Ongoing ecological speciation in  
669 *Cotesia sesamiae*, a biological control agent of cereal stem borers. *Evol Appl* 8, 807–820.  
670 <https://doi.org/10.1111/eva.12260>

- 671 Lattorff, H.M.G., Moritz, R.F.A., Fuchs, S., 2005. A single locus determines thelytokous  
672 parthenogenesis of laying honeybee workers (*Apis mellifera capensis*). *Heredity* 94, 533–537.  
673 <https://doi.org/10.1038/sj.hdy.6800654>
- 674 Leach, I.M., Pannebakker, B.A., Schneider, M.V., Driessen, G., van de Zande, L., Beukeboom, L.W.,  
675 2009. Thelytoky in Hymenoptera with *Venturia canescens* and *Leptopilina clavipes* as Case Studies,  
676 in: Schön, I., Martens, K., Dijk, P. (Eds.), *Lost Sex*. Springer Netherlands, Dordrecht, pp. 347–375.  
677 [https://doi.org/10.1007/978-90-481-2770-2\\_17](https://doi.org/10.1007/978-90-481-2770-2_17)
- 678 Liegeois, M., Sartori, M., Schwander, T., 2021. Extremely Widespread Parthenogenesis and a Trade-  
679 Off Between Alternative Forms of Reproduction in Mayflies (Ephemeroptera). *Journal of Heredity*  
680 112, 45–57. <https://doi.org/10.1093/jhered/esaa027>
- 681 Little, C.J., Chapuis, M.-P., Blondin, L., Chapuis, E., Jourdan-Pineau, H., 2017. Exploring the  
682 relationship between tytoparthenogenesis and inbreeding depression in the Desert Locust,  
683 *Schistocerca gregaria*. *Ecol Evol* 7, 6003–6011. <https://doi.org/10.1002/ece3.3103>
- 684 Liu, Q., Zhou, J., Zhang, C., Ning, S., Duan, L., Dong, H., 2019. Co-occurrence of thelytokous and  
685 bisexual *Trichogramma dendrolimi* Matsumura (Hymenoptera: Trichogrammatidae) in a natural  
686 population. *Sci Rep* 9, 17480. <https://doi.org/10.1038/s41598-019-53992-8>
- 687 Ma, W.-J., Schwander, T., 2017. Patterns and mechanisms in instances of endosymbiont-induced  
688 parthenogenesis. *J. Evol. Biol.* 30, 868–888. <https://doi.org/10.1111/jeb.13069>
- 689 Meirmans, S., Meirmans, P.G., Kirkendall, L.R., 2012. The Costs Of Sex: Facing Real-world  
690 Complexities. *The Quarterly Review of Biology* 87, 19–40. <https://doi.org/10.1086/663945>
- 691 Mochiah, M.B., Ngi-Song, A.J., Overholt, W.A., Stouthamer, R., 2002. *Wolbachia* infection in *Cotesia*  
692 *sesamiae* (Hymenoptera: Braconidae) causes cytoplasmic incompatibility: implications for biological  
693 control. *Biological Control* 25, 74–80. [https://doi.org/10.1016/S1049-9644\(02\)00045-2](https://doi.org/10.1016/S1049-9644(02)00045-2)
- 694 Morgan-Richards, M., Trewick, S.A., 2005. Hybrid origin of a parthenogenetic genus? *Molecular*  
695 *Ecology* 14, 2133–2142. <https://doi.org/10.1111/j.1365-294X.2005.02575.x>
- 696 Neiman, M., Sharbel, T.F., Schwander, T., 2014. Genetic causes of transitions from sexual  
697 reproduction to asexuality in plants and animals. *J. Evol. Biol.* 27, 1346–1359.  
698 <https://doi.org/10.1111/jeb.12357>
- 699 Niyibigira, E.I., Overholt, W.A., Stouthamer, R., 2004. *Cotesia flavipes* Cameron (Hymenoptera:  
700 Braconidae) does not exhibit complementary sex determination (ii) Evidence from laboratory  
701 experiments. *Appl. Entomol. Zool.* 39, 717–725. <https://doi.org/10.1303/aez.2004.717>
- 702 Otto, S.P., 2009. The Evolutionary Enigma of Sex. *The American Naturalist* 174, S1–S14.  
703 <https://doi.org/10.1086/599084>
- 704 Pardo, M.C., López-León, M.D., Cabrero, J., Camacho, J.P.M., 1995. Cytological and developmental  
705 analysis of tytoparthenogenesis in *Locusta migratoria*. *Heredity* 75, 485–494.  
706 <https://doi.org/10.1038/hdy.1995.165>
- 707 Pijls, J.W.A.M., van Steenbergen, H.J., van Alphen, J.J.M., 1996. Asexuality cured: the relations and  
708 differences between sexual and asexual *Apoanagyrus diversicornis*. *Heredity* 76, 506–513.  
709 <https://doi.org/10.1038/hdy.1996.73>

- 710 Rabeling, C., Kronauer, D.J.C., 2013. Thelytokous Parthenogenesis in Eusocial Hymenoptera. *Annu.*  
711 *Rev. Entomol.* 58, 273–292. <https://doi.org/10.1146/annurev-ento-120811-153710>
- 712 Rey, O., Loiseau, A., Facon, B., Foucaud, J., Orivel, J., Cornuet, J.-M., Robert, S., Dobigny, G., Delabie,  
713 J.H.C., Mariano, C.D.S.F., Estoup, A., 2011. Meiotic Recombination Dramatically Decreased in  
714 Thelytokous Queens of the Little Fire Ant and Their Sexually Produced Workers. *Molecular Biology*  
715 *and Evolution* 28, 2591–2601. <https://doi.org/10.1093/molbev/msr082>
- 716 Sallam, M.N., Overholt, W.A., Kairu, E., 2001. Dispersal of the exotic parasitoid *Cotesia flavipes* in a  
717 new ecosystem. *Entomologia Experimentalis et Applicata* 98, 211–217.  
718 <https://doi.org/10.1046/j.1570-7458.2001.00776.x>
- 719 Sandrock, C., Vorburger, C., 2011. Single-Locus Recessive Inheritance of Asexual Reproduction in a  
720 Parasitoid Wasp. *Current Biology* 21, 433–437. <https://doi.org/10.1016/j.cub.2011.01.070>
- 721 Schneider, M.V., Beukeboom, L.W., Driessen, G., Lapchin, L., Bernstein, C., Van Alphen, J.J.M., 2002.  
722 Geographical distribution and genetic relatedness of sympatrical thelytokous and arrhenotokous  
723 populations of the parasitoid *Venturia canescens* (Hymenoptera): Thelytoky and arrhenotoky in  
724 *Venturia canescens*. *Journal of Evolutionary Biology* 15, 191–200. <https://doi.org/10.1046/j.1420-9101.2002.00394.x>
- 726 Stouthamer, R., Pinto, J.D., Platner, G.R., Luck, R.F., 1990. Taxonomic Status of Thelytokous Forms of  
727 *Trichogramma* (Hymenoptera: Trichogrammatidae). *Annals of the Entomological Society of America*  
728 83, 475–481. <https://doi.org/10.1093/aesa/83.3.475>
- 729 The Tree of Sex Consortium, 2014. Tree of Sex: A database of sexual systems. *Sci Data* 1, 140015.  
730 <https://doi.org/10.1038/sdata.2014.15>
- 731 Tsutsui, Y., Maeto, K., Hamaguchi, K., Isaki, Y., Takami, Y., Naito, T., Miura, K., 2014. Apomictic  
732 parthenogenesis in a parasitoid wasp *Meteorus pulchricornis*, uncommon in the haplodiploid order  
733 Hymenoptera. *Bull. Entomol. Res.* 104, 307–313. <https://doi.org/10.1017/S0007485314000017>
- 734 Tvedte, E.S., Logsdon, J.M., Forbes, A.A., 2019. Sex loss in insects: causes of asexuality and  
735 consequences for genomes. *Current Opinion in Insect Science* 31, 77–83.  
736 <https://doi.org/10.1016/j.cois.2018.11.007>
- 737 van de Zande, L., Verhulst, E.C., 2014. Genomic Imprinting and Maternal Effect Genes in Haplodiploid  
738 Sex Determination. *Sex Dev* 8, 74–82. <https://doi.org/10.1159/000357146>
- 739 van der Kooij, C.J., Matthey-Doret, C., Schwander, T., 2017. Evolution and comparative ecology of  
740 parthenogenesis in haplodiploid arthropods. *Evolution Letters* 1, 304–316.  
741 <https://doi.org/10.1002/evl3.30>
- 742 van Wilgenburg, E., Driessen, G., Beukeboom, L., 2006. Single locus complementary sex  
743 determination in Hymenoptera: an “unintelligent” design? *Front Zool* 3, 1.  
744 <https://doi.org/10.1186/1742-9994-3-1>
- 745 van der Kooij, C.J., Schwander, T., 2015. Parthenogenesis: Birth of a New Lineage or Reproductive  
746 Accident? *Current Biology* 25, R659–R661. <https://doi.org/10.1016/j.cub.2015.06.055>
- 747 Verma, S., Ruttner, F., 1983. Cytological analysis of the thelytokous parthenogenesis in the Cape  
748 honeybee (*Apis mellifera capensis* Escholtz). *Apidologie* 14, 41–57.  
749 <https://doi.org/10.1051/apido:19830104>

- 750 Vershinina, A.O., Kuznetsova, V.G., 2016. Parthenogenesis in Hexapoda: Entognatha and non-  
751 holometabolous insects. *J Zoolog Syst Evol Res* 54, 257–268. <https://doi.org/10.1111/jzs.12141>
- 752 Vorburger, C., 2014. Thelytoky and Sex Determination in the Hymenoptera: Mutual Constraints. *Sex*  
753 *Dev* 8, 50–58. <https://doi.org/10.1159/000356508>
- 754 Weeks, A.R., Breeuwer, J.A.J., 2001. *Wolbachia* –induced parthenogenesis in a genus of  
755 phytophagous mites. *Proc. R. Soc. Lond. B* 268, 2245–2251. <https://doi.org/10.1098/rspb.2001.1797>
- 756 Whiting, P.W., 1945. The Evolution of Male Haploidy. *The Quarterly Review of Biology* 20, 231–260.  
757 <https://doi.org/10.1086/394884>
- 758 Zchori-Fein, E., Perlman, S.J., 2004. Distribution of the bacterial symbiont *Cardinium* in arthropods:  
759 *Molecular Ecology* 13, 2009–2016. <https://doi.org/10.1111/j.1365-294X.2004.02203.x>
- 760 Zhou, Y., Gu, H., Dorn, S., 2007. Effects of inbreeding on fitness components of *Cotesia glomerata*, a  
761 parasitoid wasp with single-locus complementary sex determination (sl-CSD). *Biological Control* 40,  
762 273–279. <https://doi.org/10.1016/j.biocontrol.2006.11.002>
- 763 Zhou, Y., Gu, H., Dorn, S., 2006. Single-locus sex determination in the parasitoid wasp *Cotesia*  
764 *glomerata* (Hymenoptera: Braconidae). *Heredity* 96, 487–92. <https://doi.org/10.1038/sj.hdy.6800829>
- 765
